# Supplementary material for: Gold-catalyzed homo- and cross-annulation of alkynyl carboxylic acids: a facile access to substituted 4-hydroxy 2H-pyrones and total synthesis of pseudopyronine A
Source: Royal Society of Chemistry journal article supplement (doi:10.1039/d0ob01700k), 2020-01-01

## Supporting Information

### Gold-Catalyzed Homo- and Cross-Annulation of Alkynyl Carboxylic Acids: Facile Access to Substituted 4-Hydroxy 2H-Pyrones and Total Synthesis of Pseudopyronine A

Gayyur, Shivani Choudhary, Anchal Saxena, Nayan Ghosh\*

*Division of Medicinal and Process Chemistry, CSIR-Central Drug Research Institute,  
Lucknow-226031, U.P., India*

*Chemical Sciences Division, Academy of Scientific & Innovative Research (AcSIR),  
Ghaziabad-201002, U.P. India*

[nayan.ghosh@cdri.res.in](mailto:nayan.ghosh@cdri.res.in)

| Table of Contents | Page |
|-------------------|------|
| Spectra           | 2-33 |

GR 20 62

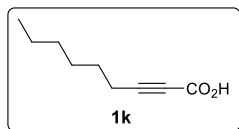

<sup>1</sup>H NMR spectrum  
CDCl<sub>3</sub>, 400 MHz

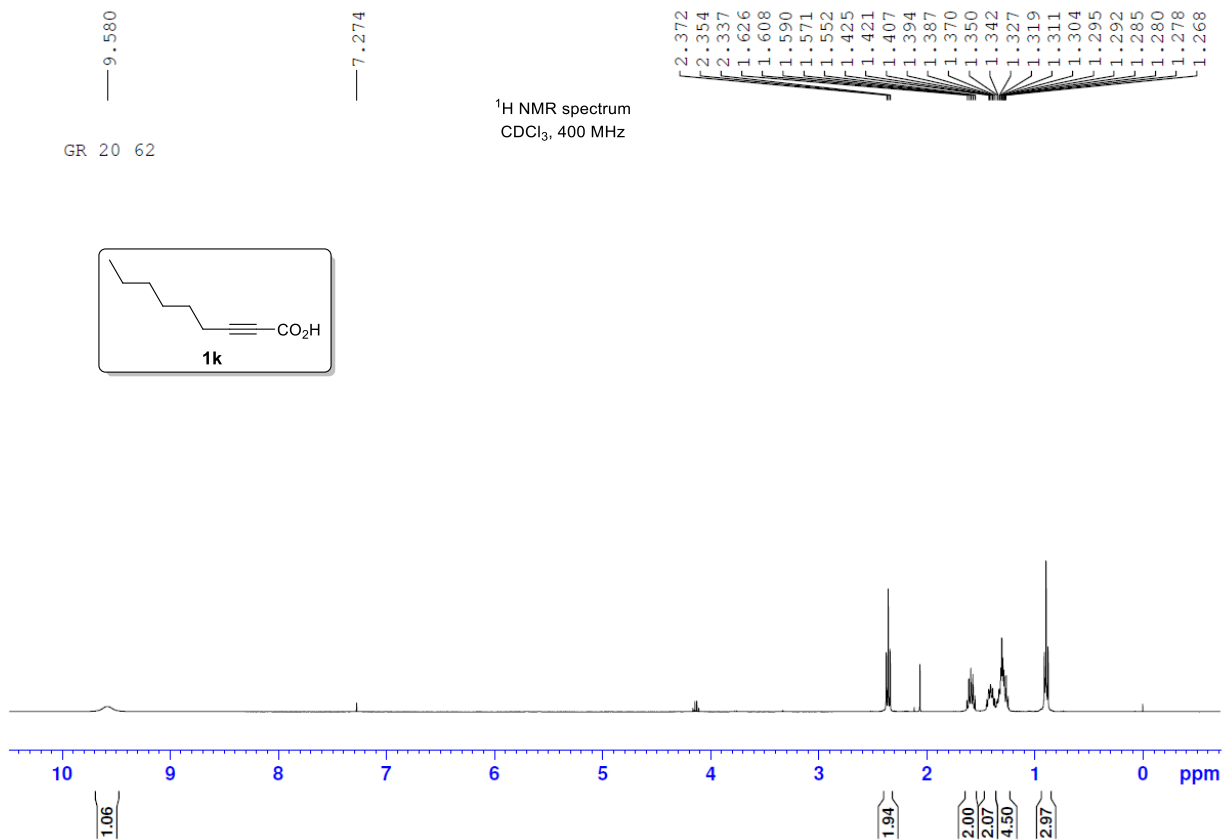

GR 20 62

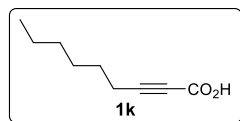

<sup>13</sup>C NMR spectrum  
CDCl<sub>3</sub>, 101 MHz

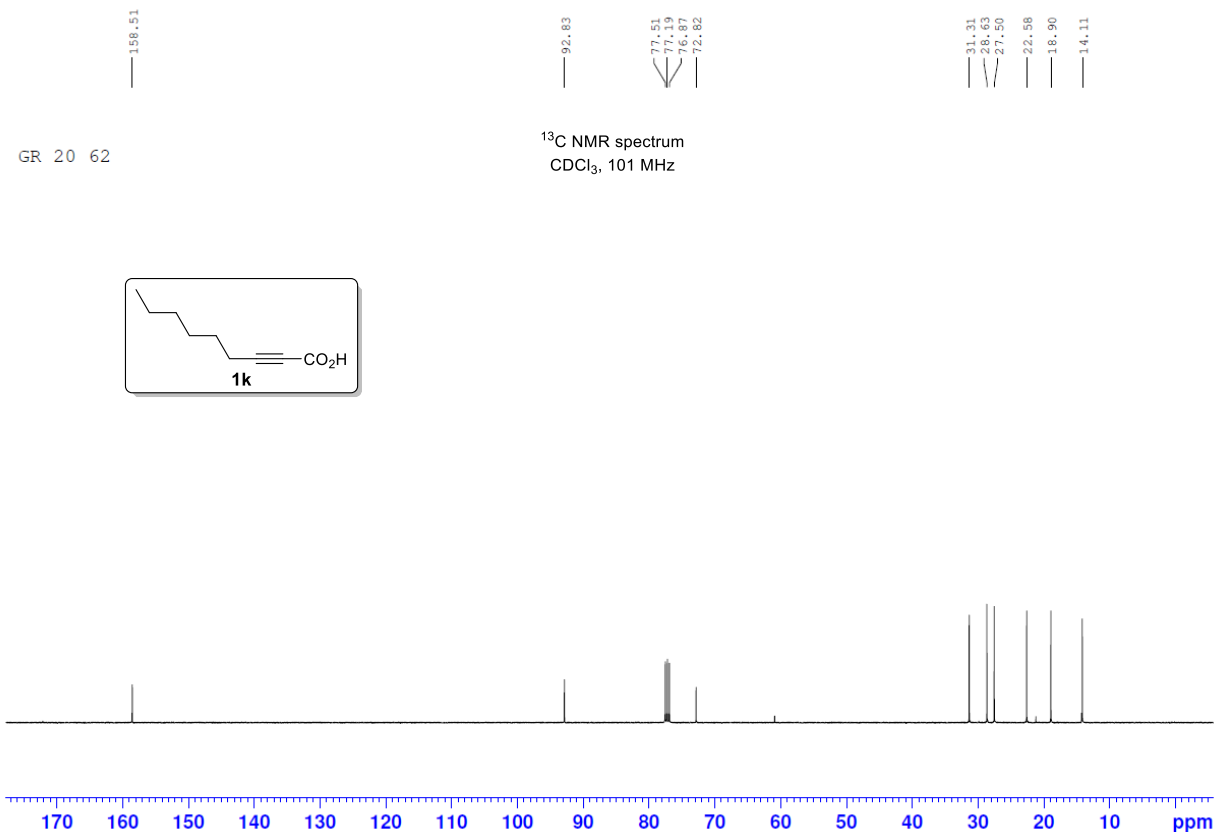

GR 20 60

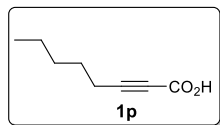

— 7.911  
— 7.293

<sup>1</sup>H NMR spectrum  
CDCl<sub>3</sub>, 400 MHz

2.365  
2.355  
2.348  
2.339  
2.331  
2.331  
1.610  
1.594  
1.582  
1.577  
1.409  
1.390  
1.371  
1.363  
1.361  
1.357  
1.341  
1.324  
0.925  
0.908  
0.895  
0.892

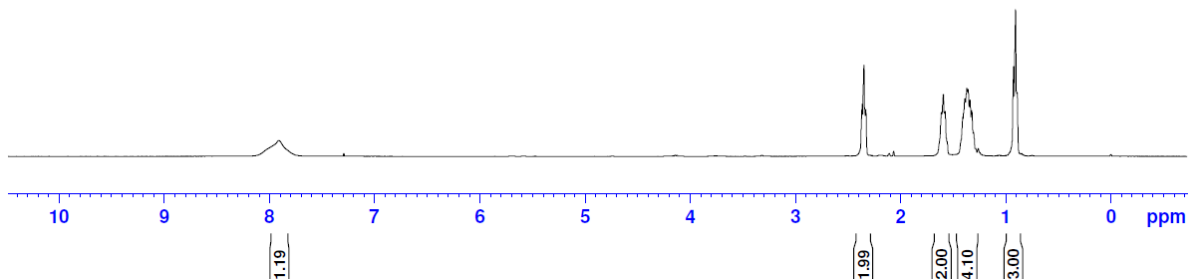

GR 20 60

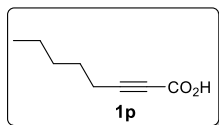

<sup>13</sup>C NMR spectrum  
CDCl<sub>3</sub>, 101 MHz

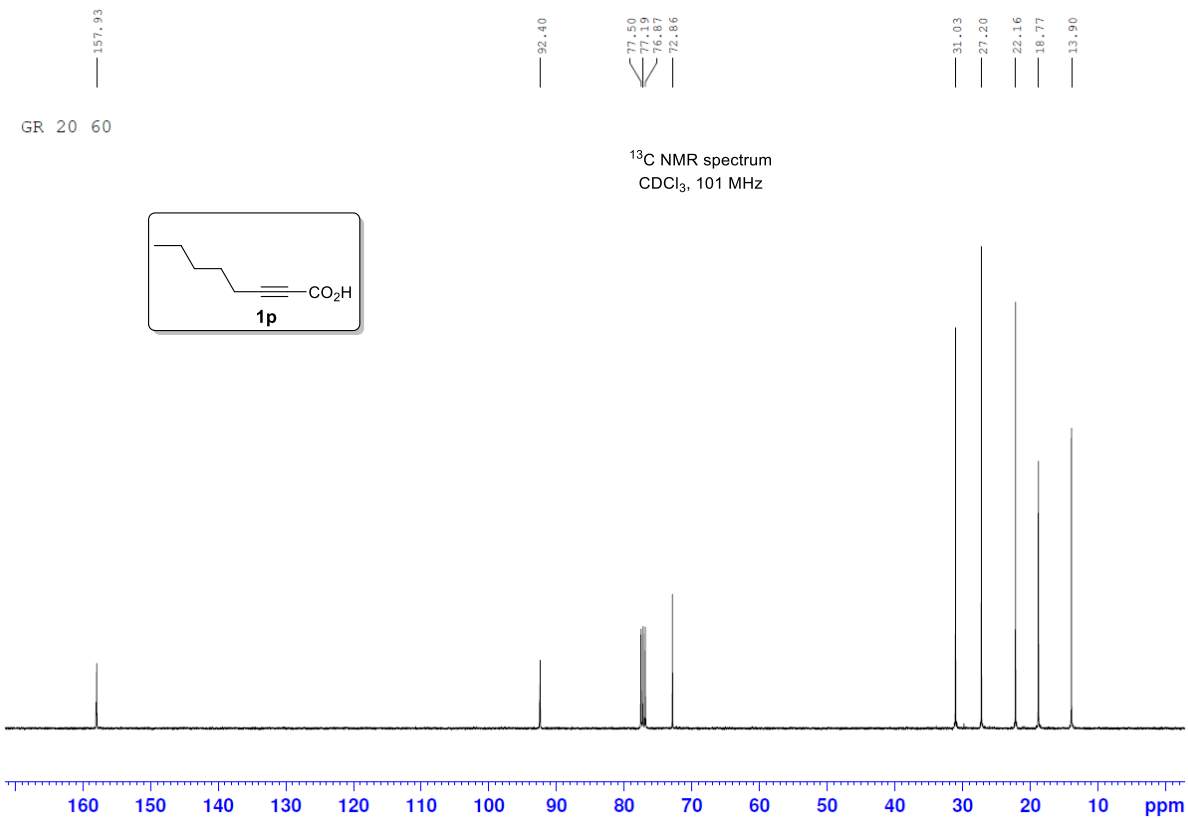

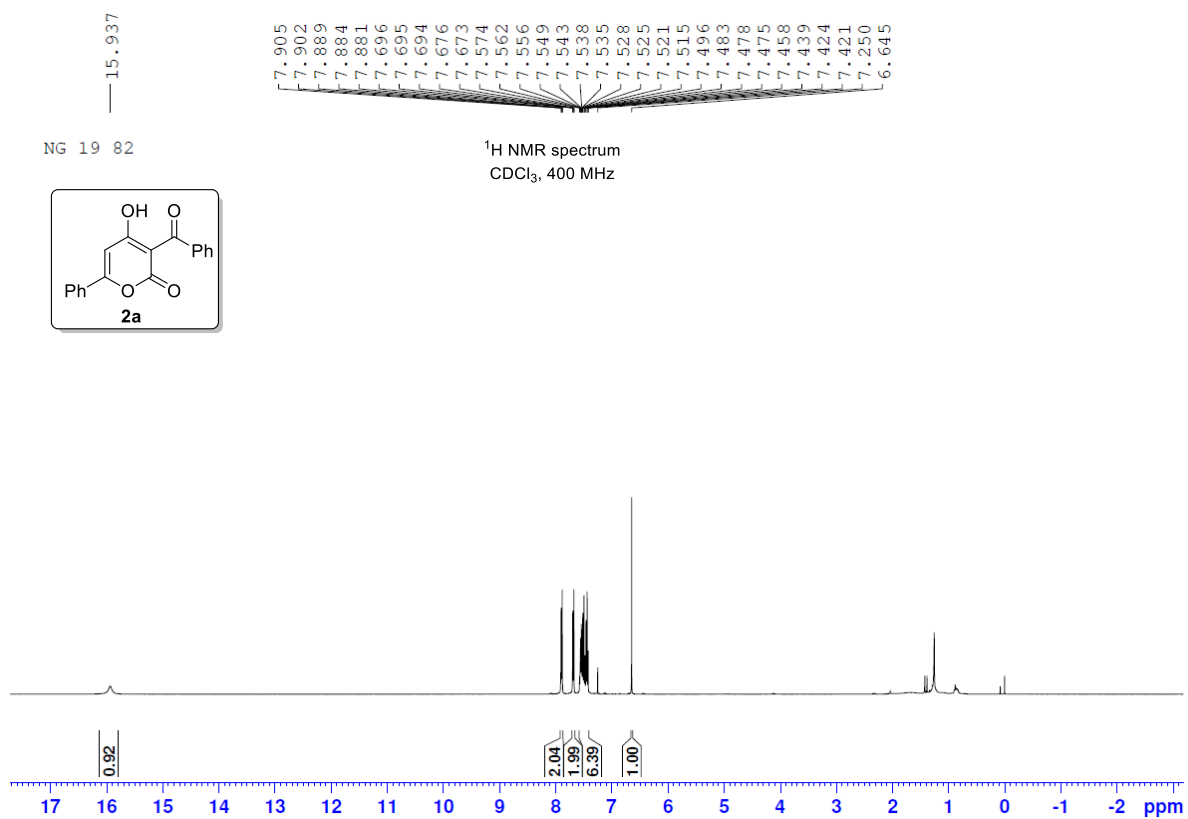

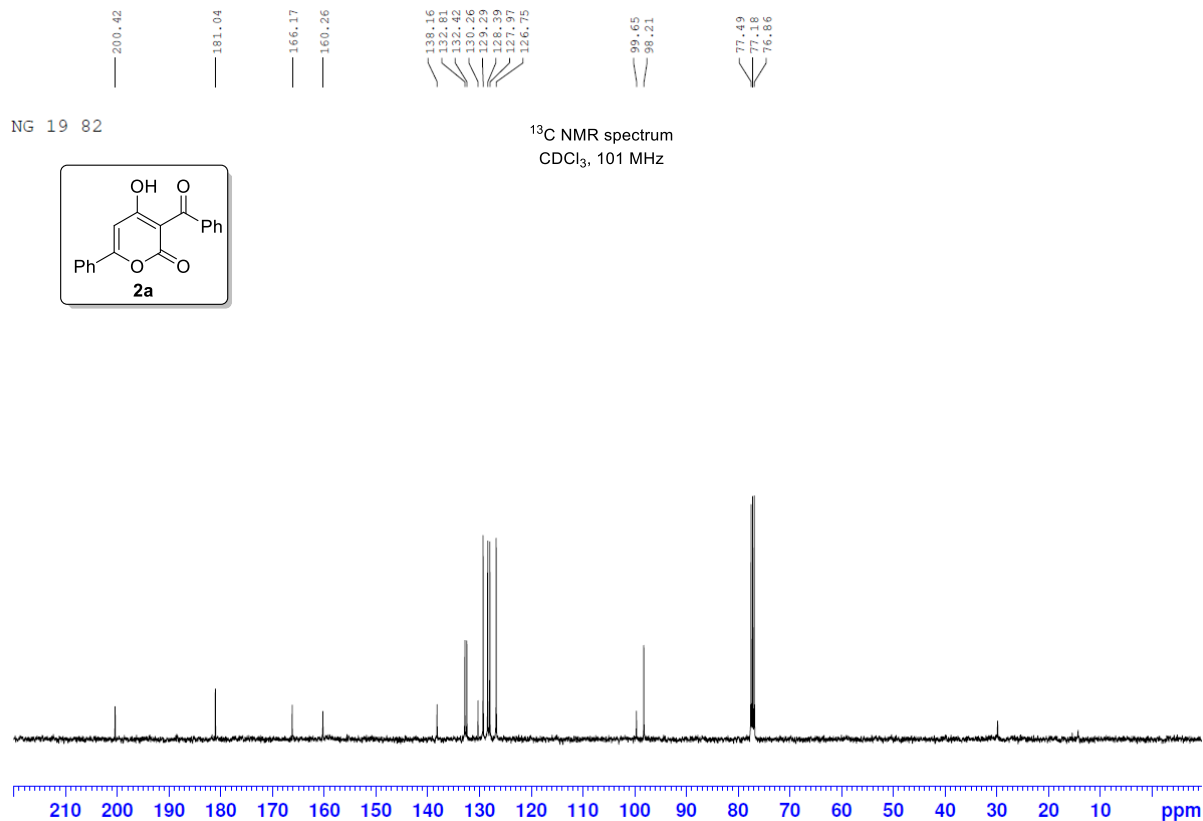

D:\INTERNALS\2019\AUG2019\HRMS19123AUG12

8/23/2019 12:47:11 PM

NG-19-72

HRMS19123AUG12 #13 RT: 0.19 AV: 1 SB: 4 0.03-0.08 NL: 5.86E6  
T: FTMS + p ESI Full ms [100.00-2000.00]

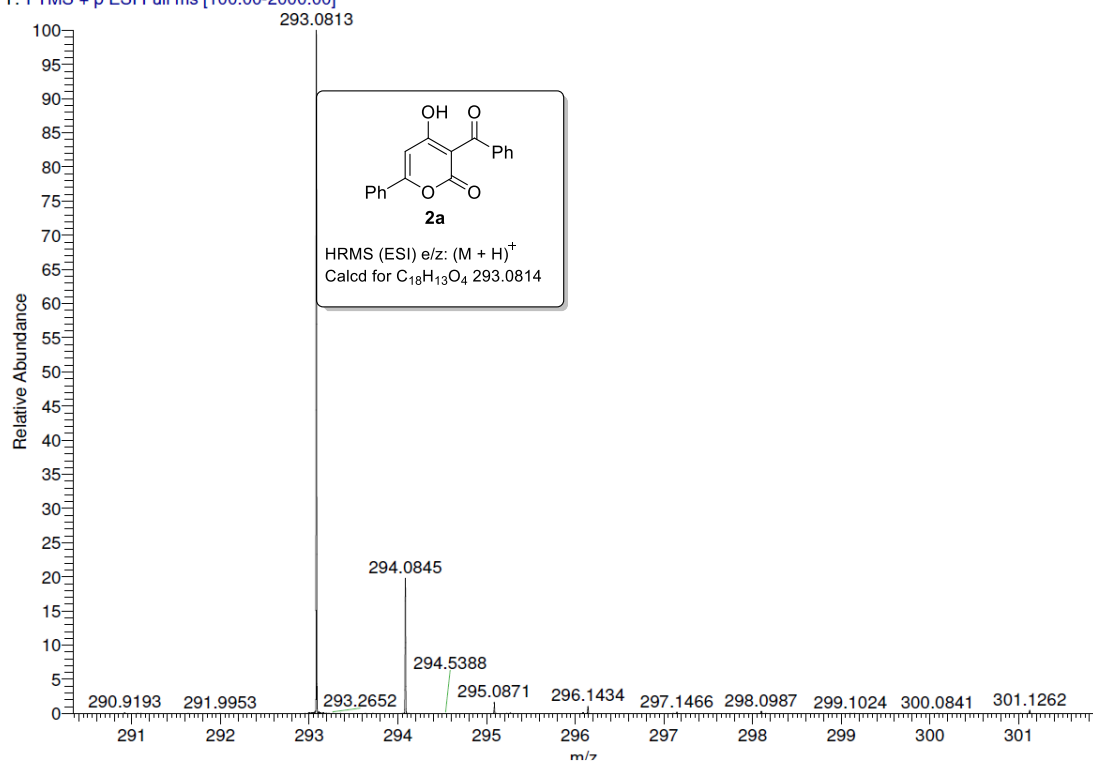

GR 19 23  
15.925

7.733  
7.713  
7.555  
7.535  
7.240  
7.220  
7.184  
7.177  
7.157  
6.520

2.359  
2.347

<sup>1</sup>H NMR spectrum  
CDCl<sub>3</sub>, 400 MHz

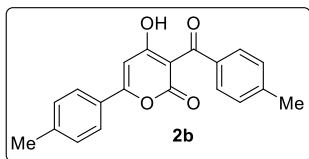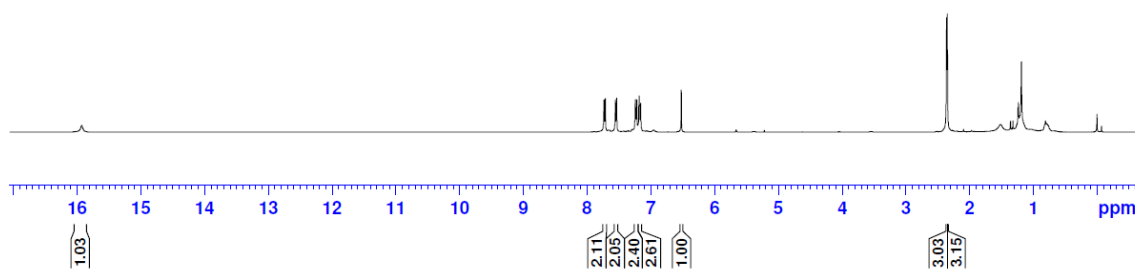

199.96  
181.05  
166.25  
160.51  
143.73  
143.32  
135.40  
128.77  
128.69  
127.62  
126.77

99.48  
97.55

77.49  
77.02  
76.85

21.90  
21.80

GR 19 23

<sup>13</sup>C NMR spectrum  
CDCl<sub>3</sub>, 101 MHz

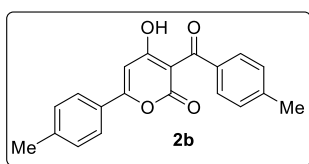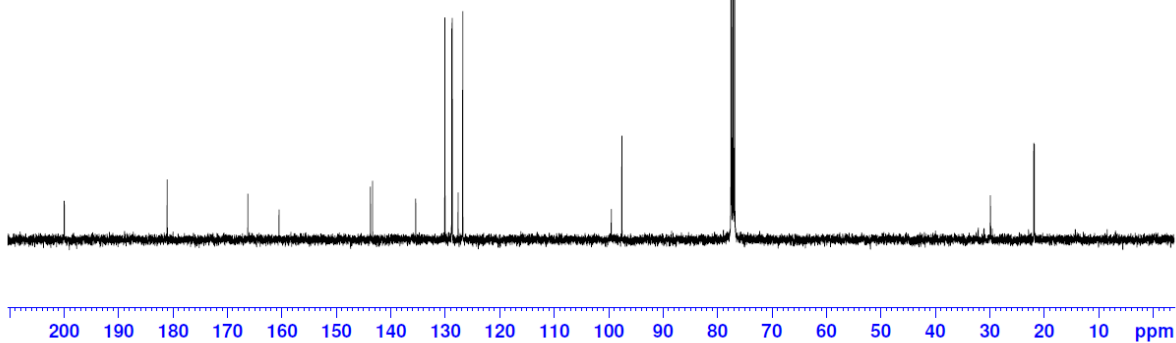

HRMS1918DEC12 #19-36 RT: 0.14-0.27 AV: 18 SB: 8 0.02-0.08 NL: 5.14E6  
T: FTMS + p ESI Full ms [100.00-1500.00]

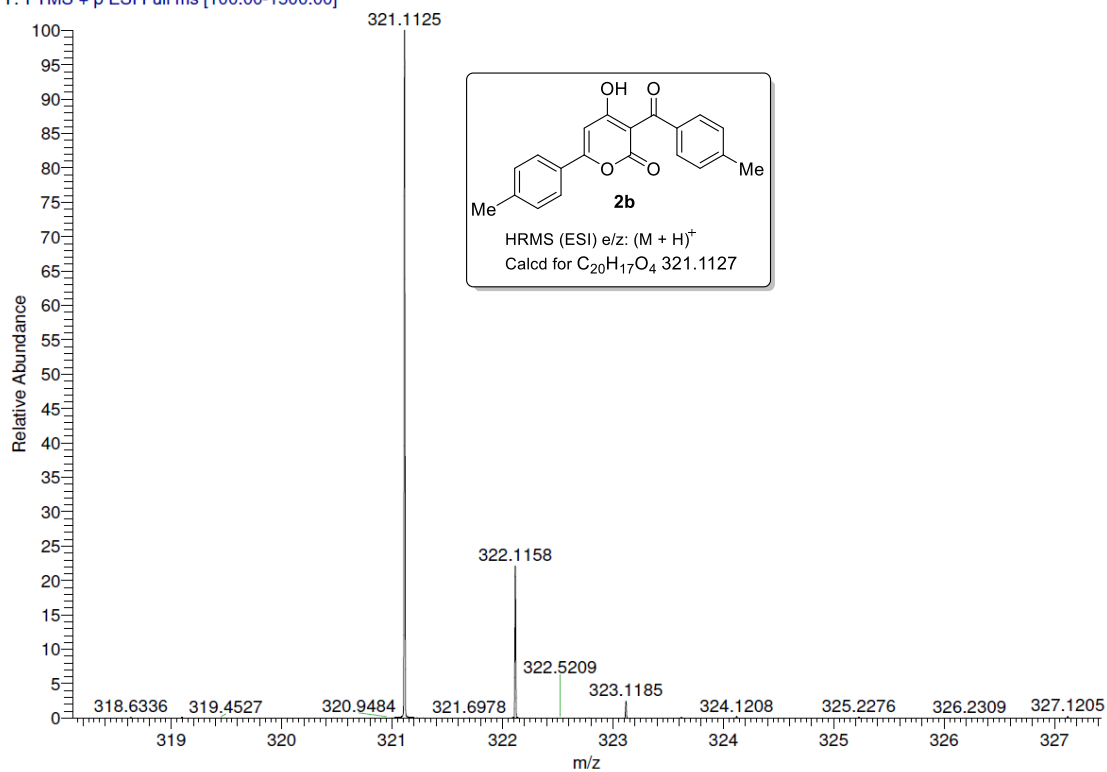

15.973  
NG 1991 1H

7.805  
7.782  
7.689  
7.667  
7.187  
6.933  
6.911  
6.864  
6.842  
6.450

3.815  
3.802

<sup>1</sup>H NMR spectrum  
CDCl<sub>3</sub>, 400 MHz

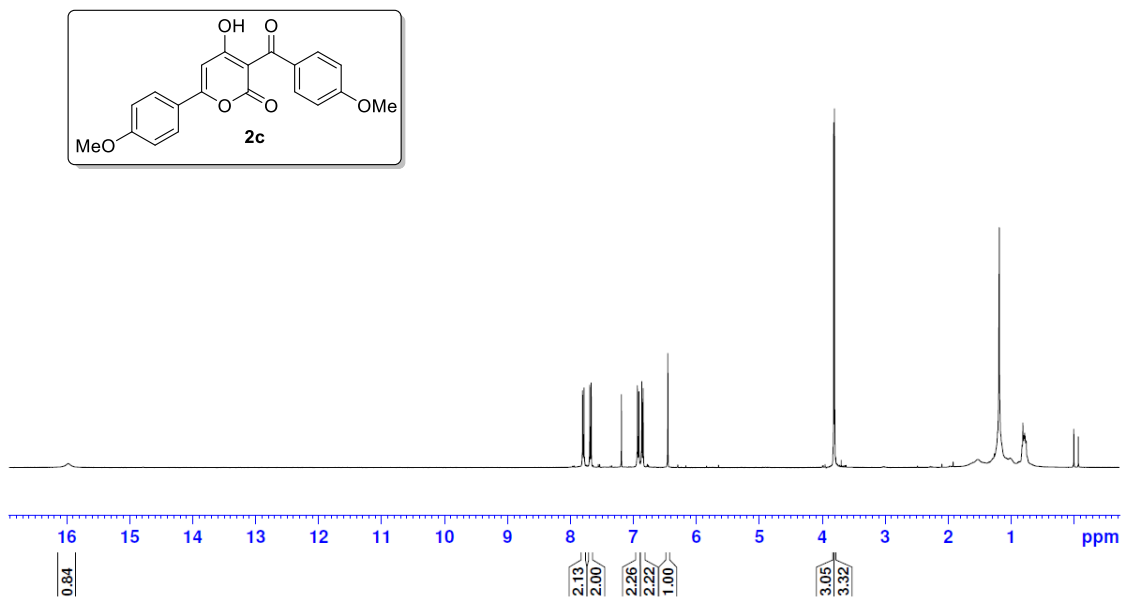

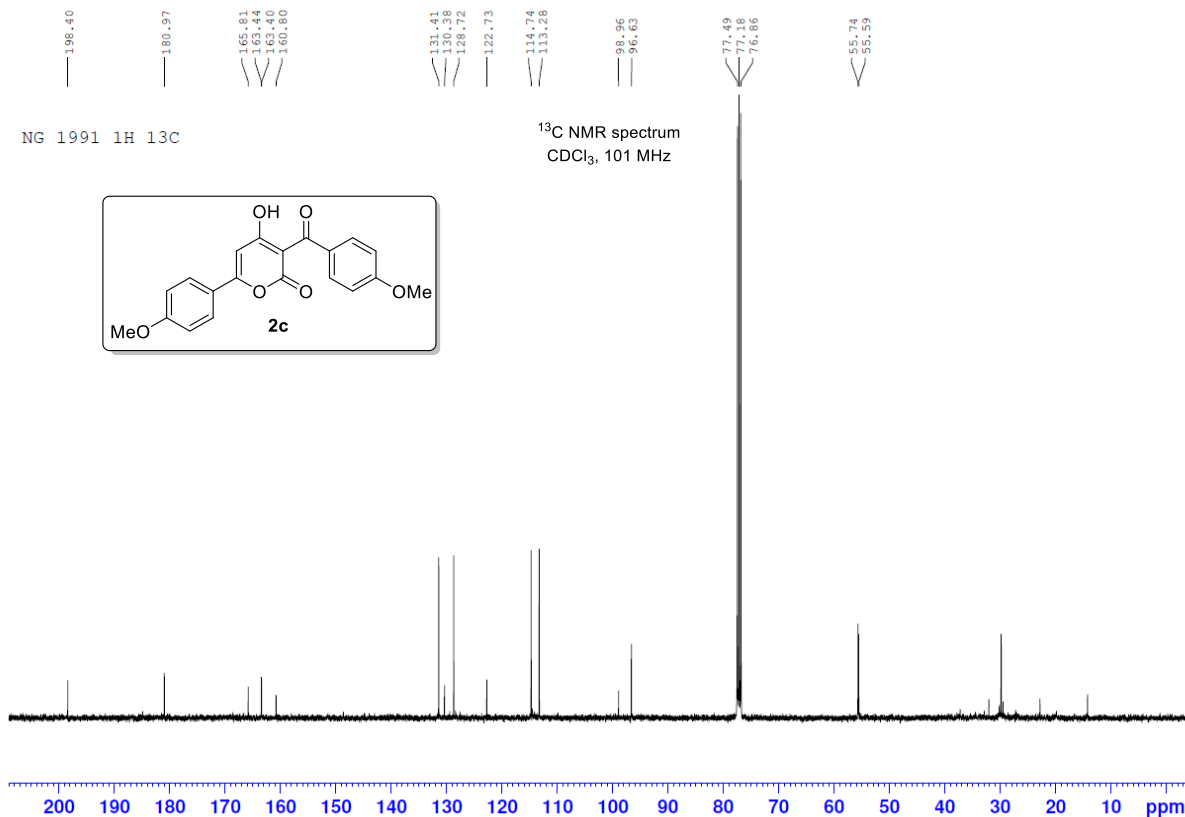

D:\INTERNALS\...\Dec 2019\HRMS19104DEC06

12/4/2019 6:50:50 PM

NG-19-91

HRMS19104DEC06 #16-32 RT: 0.12-0.24 AV: 17 SB: 8 0.02-0.08 NL: 5.34E6  
T: FTMS + p ESI Full ms [100.00-1500.00]

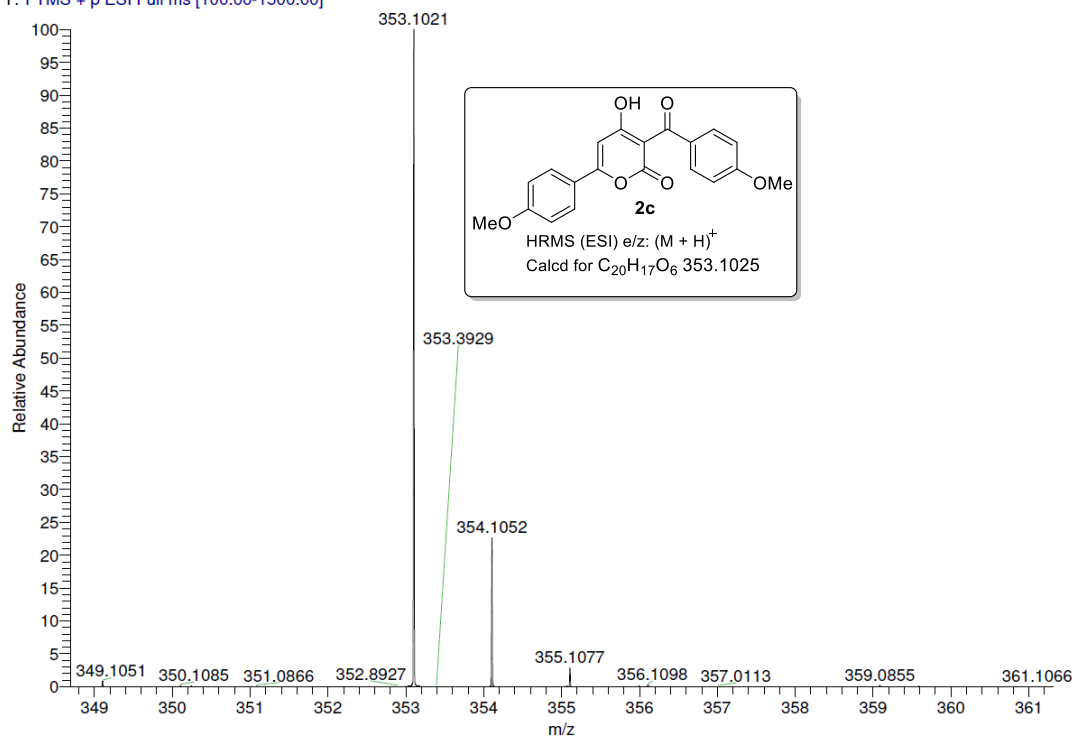



GR-19-25

15.870

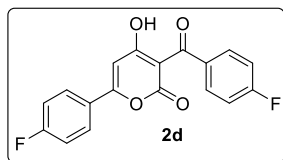

7.935  
7.922  
7.917  
7.913  
7.900  
7.748  
7.743  
7.735  
7.726  
7.713  
7.259  
7.226  
7.205  
7.184  
7.140  
7.118  
7.096  
6.593

<sup>1</sup>H NMR spectrum  
CDCl<sub>3</sub>, 400 MHz

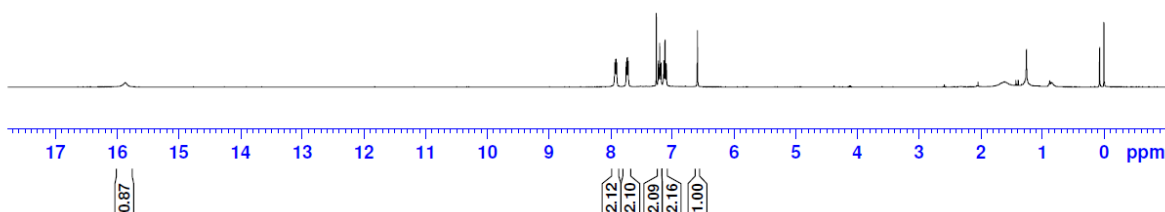

198.81

181.09

166.88

165.21

164.22

160.21

134.19

131.37

131.28

129.25

129.16

126.54

116.85

116.65

115.93

115.11

<sup>13</sup>C NMR spectrum  
CDCl<sub>3</sub>, 101 MHz

GR 19 25

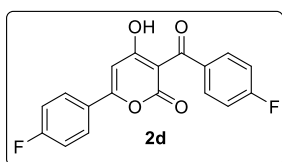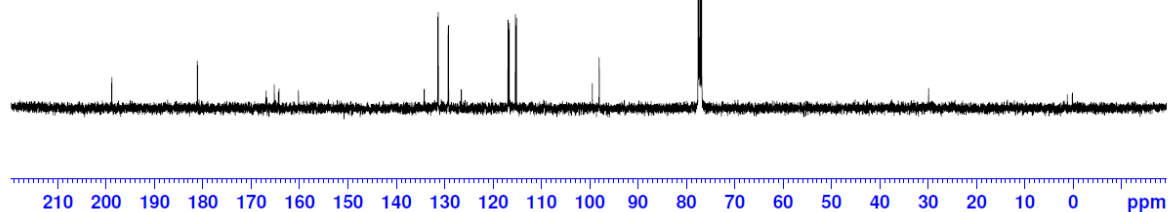

GR-19-25

$^{19}\text{F}$  NMR spectrum  
 $\text{CDCl}_3$ , 376 MHz

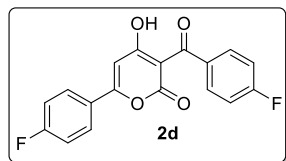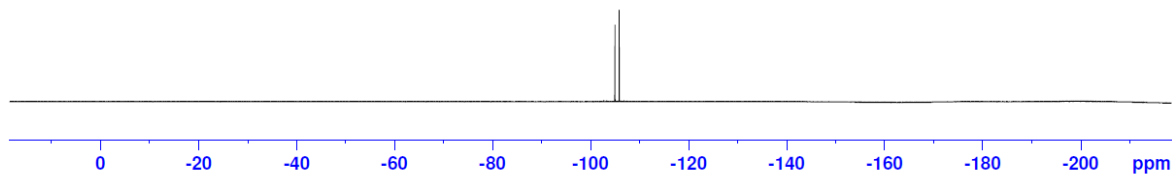

D:\INTERNALS\...Dec 2019\HRMS1918DEC09

12/18/2019 11:25:31 AM

GR-19-25

HRMS1918DEC09 #18-32 RT: 0.13-0.24 AV: 15 SB: 8 0.02-0.08 NL: 8.95E5  
T: FTMS + p ESI Full ms [100.00-1500.00]

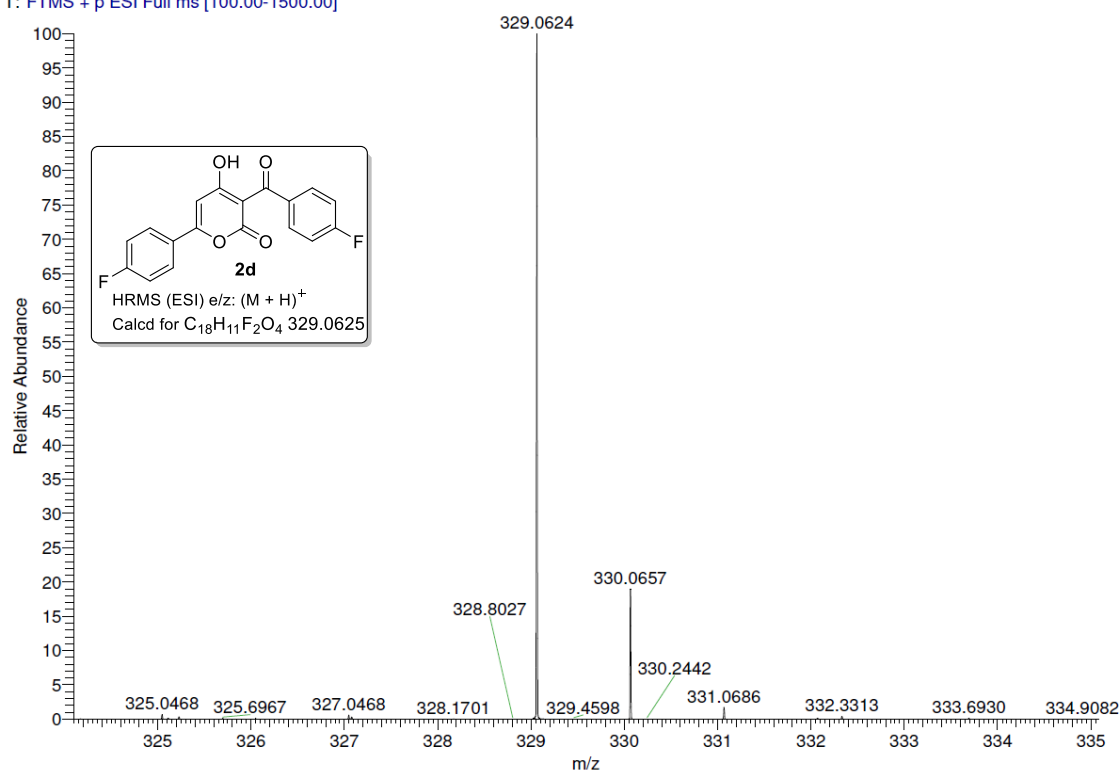

GR 19 29

7.955  
7.935  
7.724  
7.702  
7.675  
7.651  
7.630  
7.187  
6.666

<sup>1</sup>H NMR spectrum  
CDCl<sub>3</sub>, 400 MHz

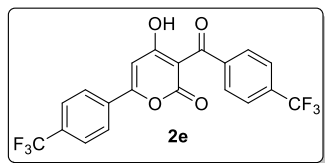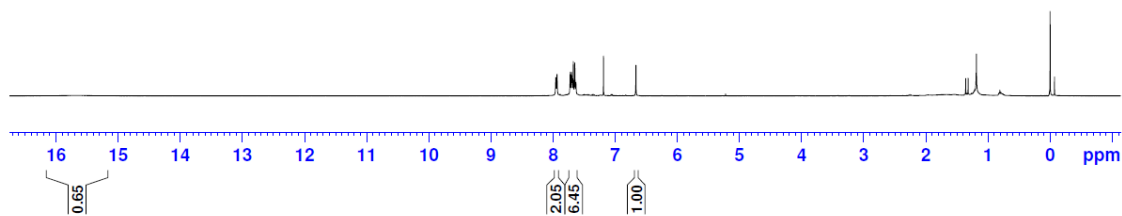

GR 19 26 II

<sup>13</sup>C NMR spectrum  
CDCl<sub>3</sub>, 101 MHz

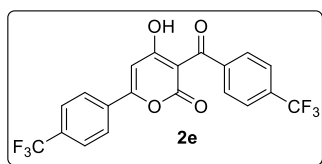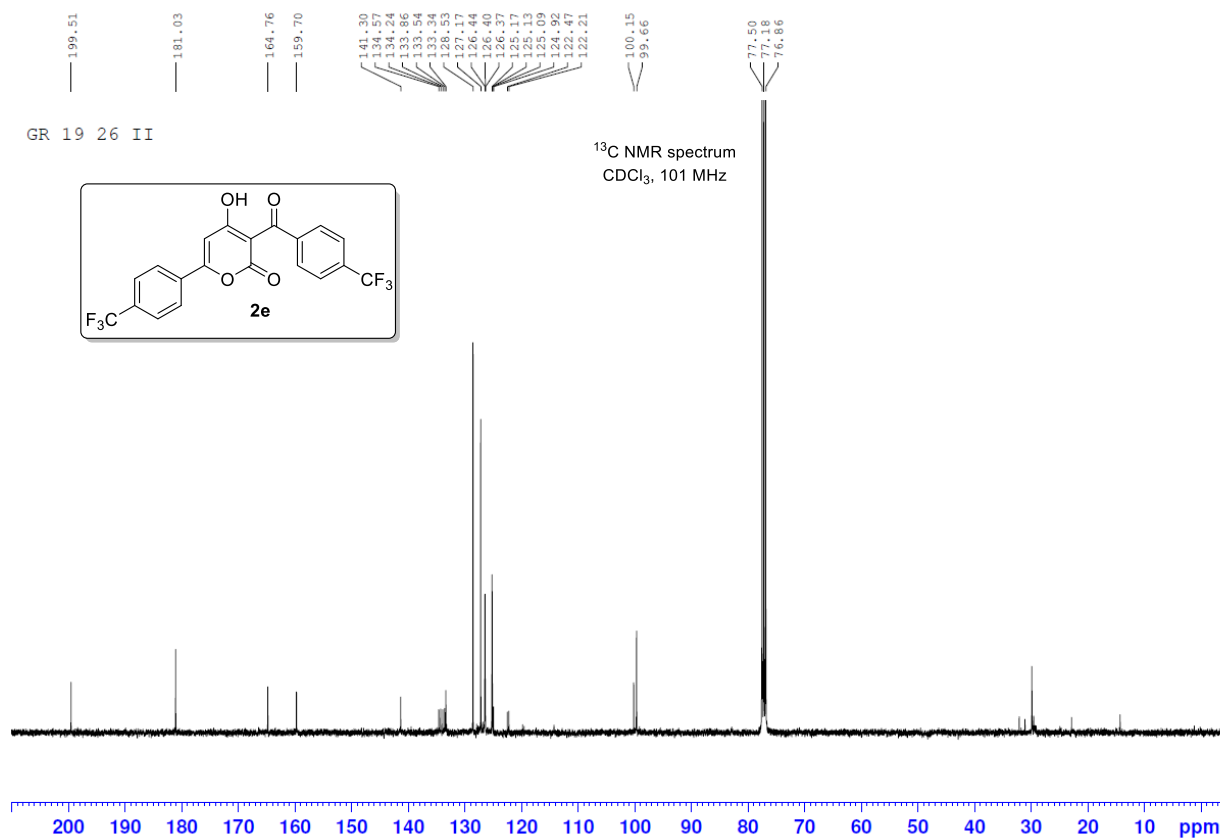

GR 19 29

-63.08  
-63.21

<sup>19</sup>F NMR spectrum  
CDCl<sub>3</sub>, 376 MHz

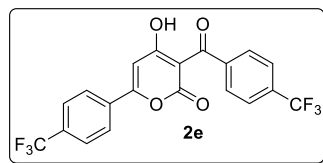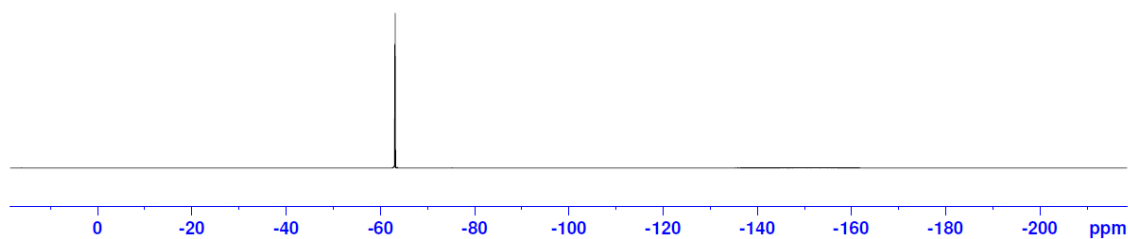

D:\INTERALS\...Dec 2019\HRMS1918DEC08

12/18/2019 11:23:32 AM

GR-19-29

HRMS1918DEC08 #24 RT: 0.18 AV: 1 SB: 8 0.02-0.08 NL: 1.09E5  
T: FTMS + p ESI Full ms [100.00-1500.00]

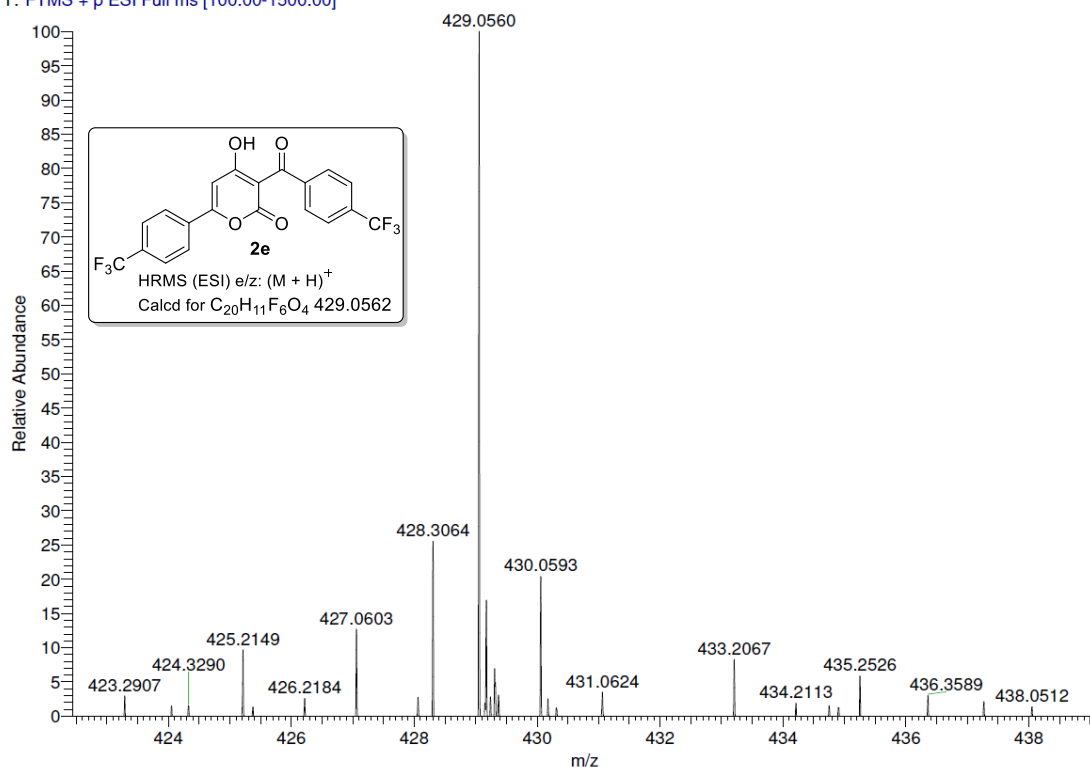

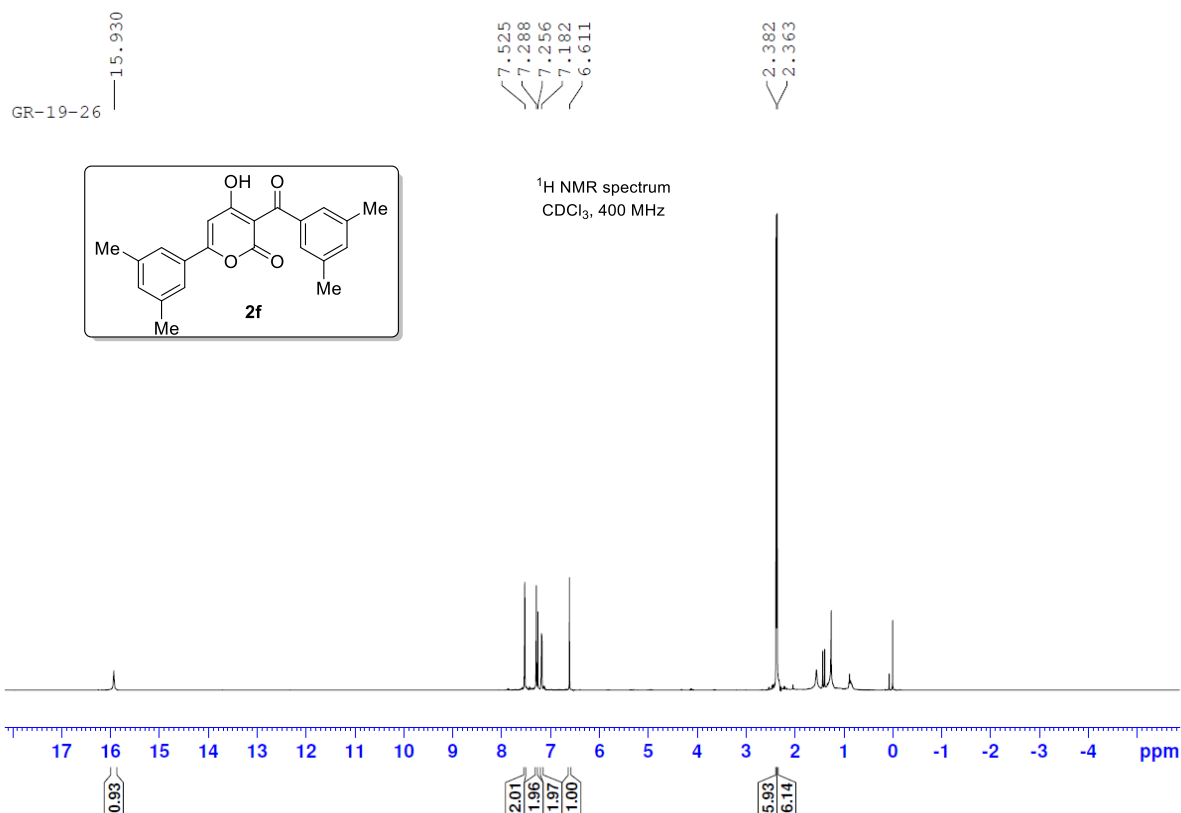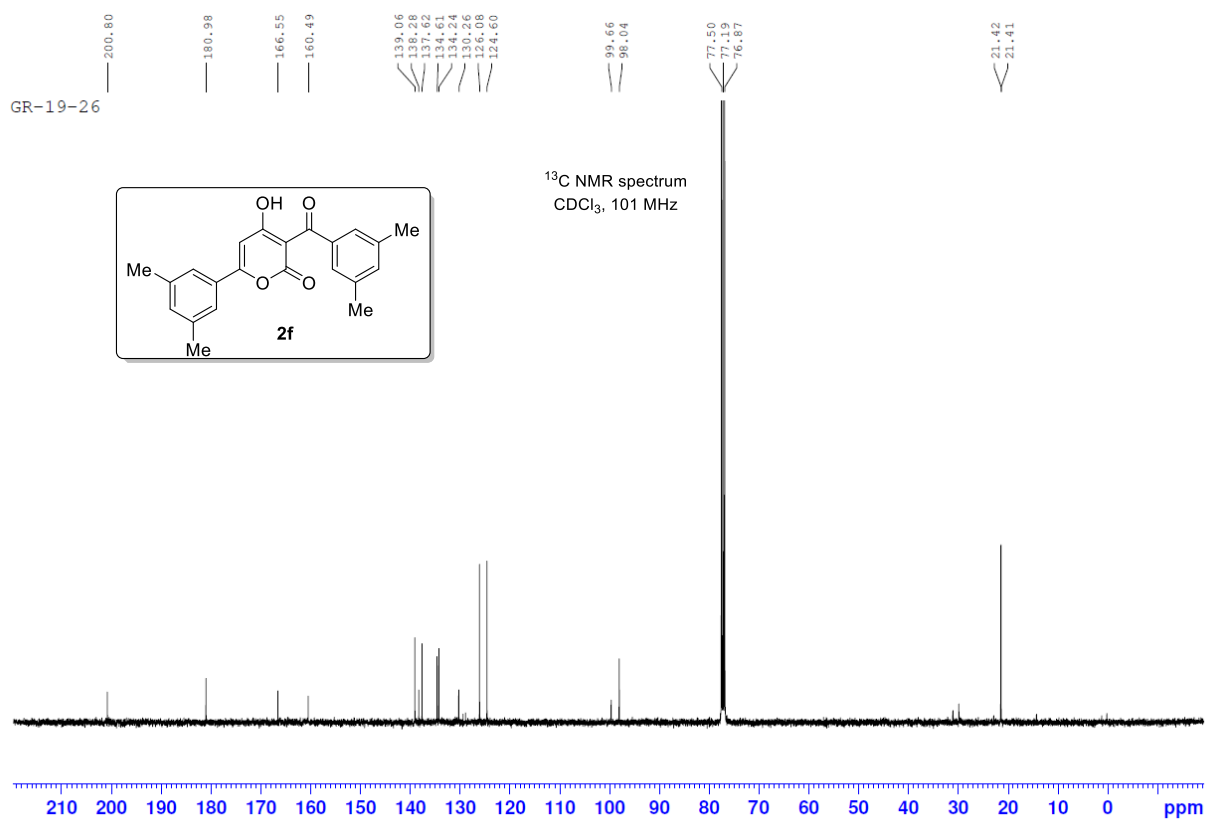

HRMS19118DEC11 #19-31 RT: 0.14-0.23 AV: 13 SB: 8 0.02-0.08 NL: 7.49E6  
T: FTMS + p ESI Full ms [100.00-1500.00]

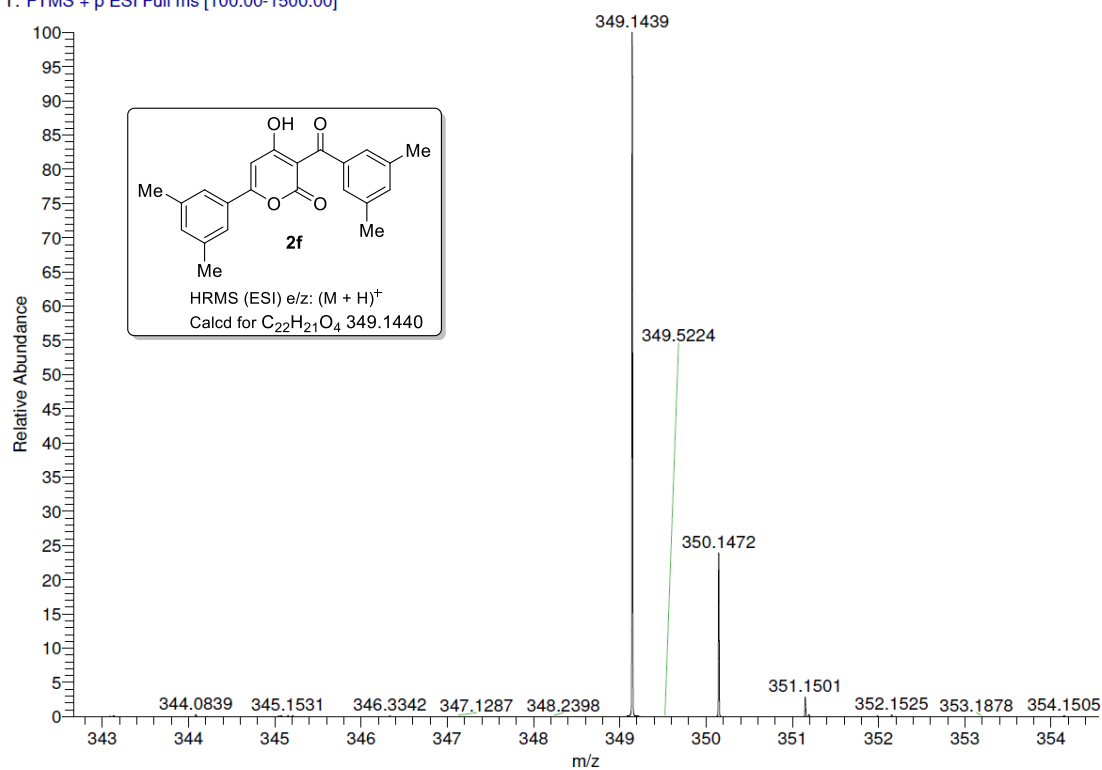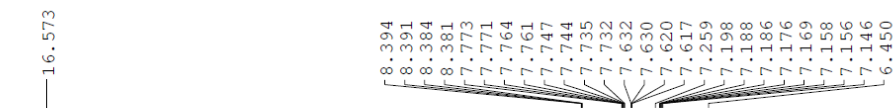

GR-19-22R

<sup>1</sup>H NMR spectrum  
CDCl<sub>3</sub>, 400 MHz

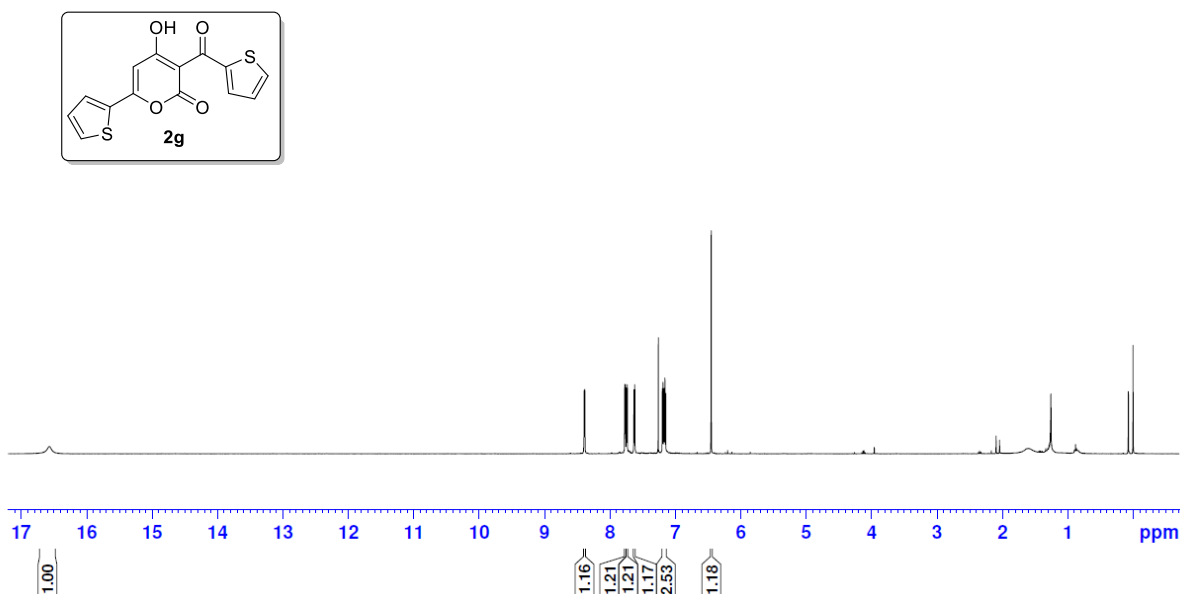

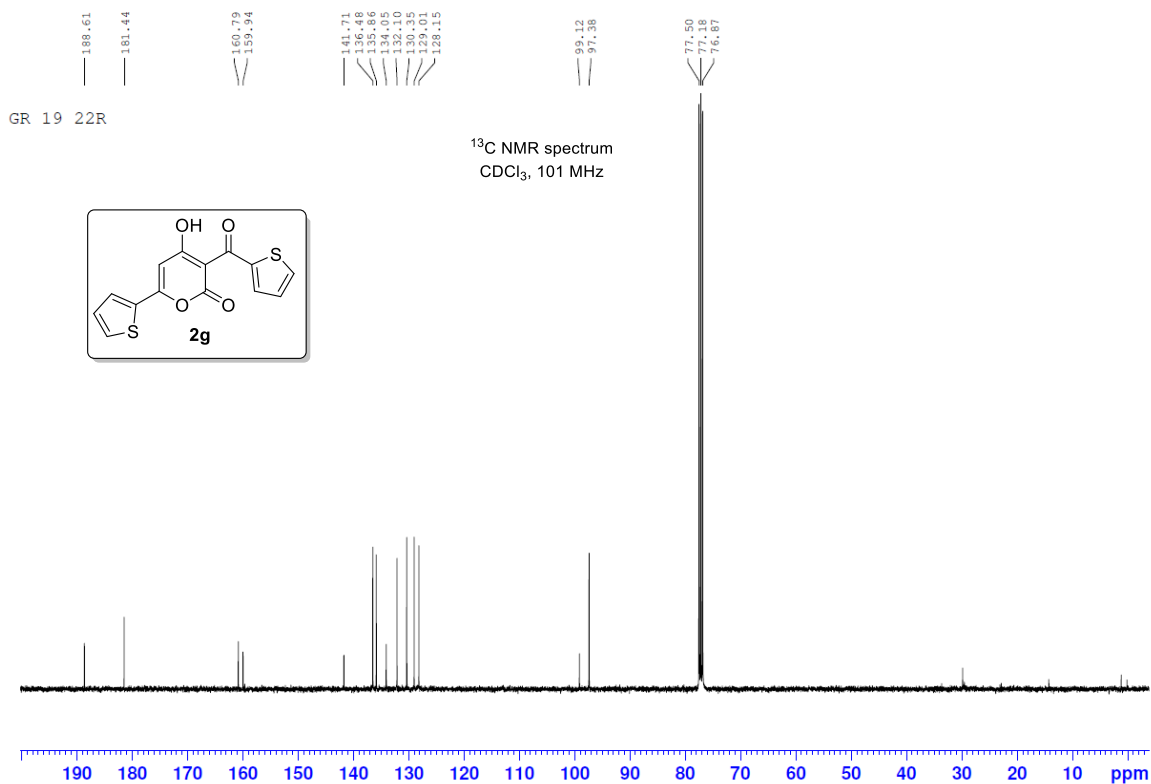

D:\INTERNALS\...Dec 2019\HRMS1918DEC10

12/18/2019 11:27:30 AM

GR-19-22

HRMS1918DEC10 #18-33 RT: 0.13-0.25 AV: 16 SB: 8 0.02-0.08 NL: 1.80E6  
T: FTMS + p ESI Full ms [100.00-1500.00]

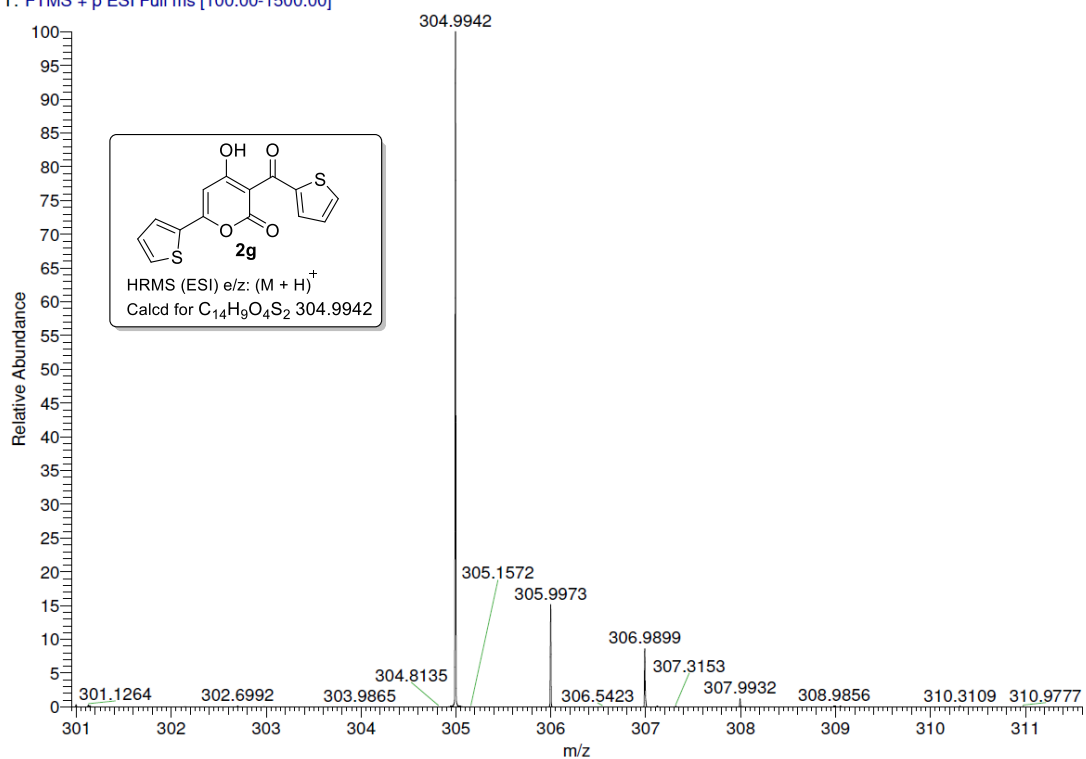

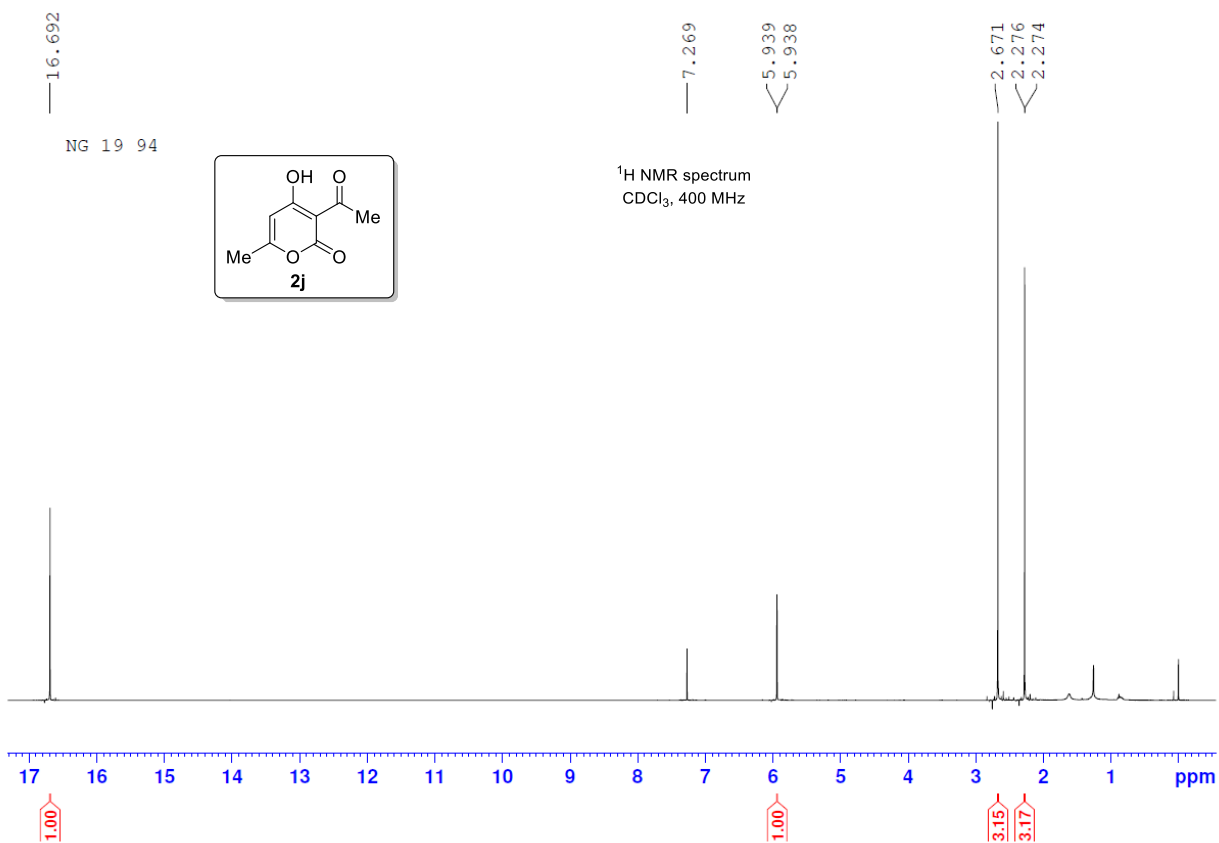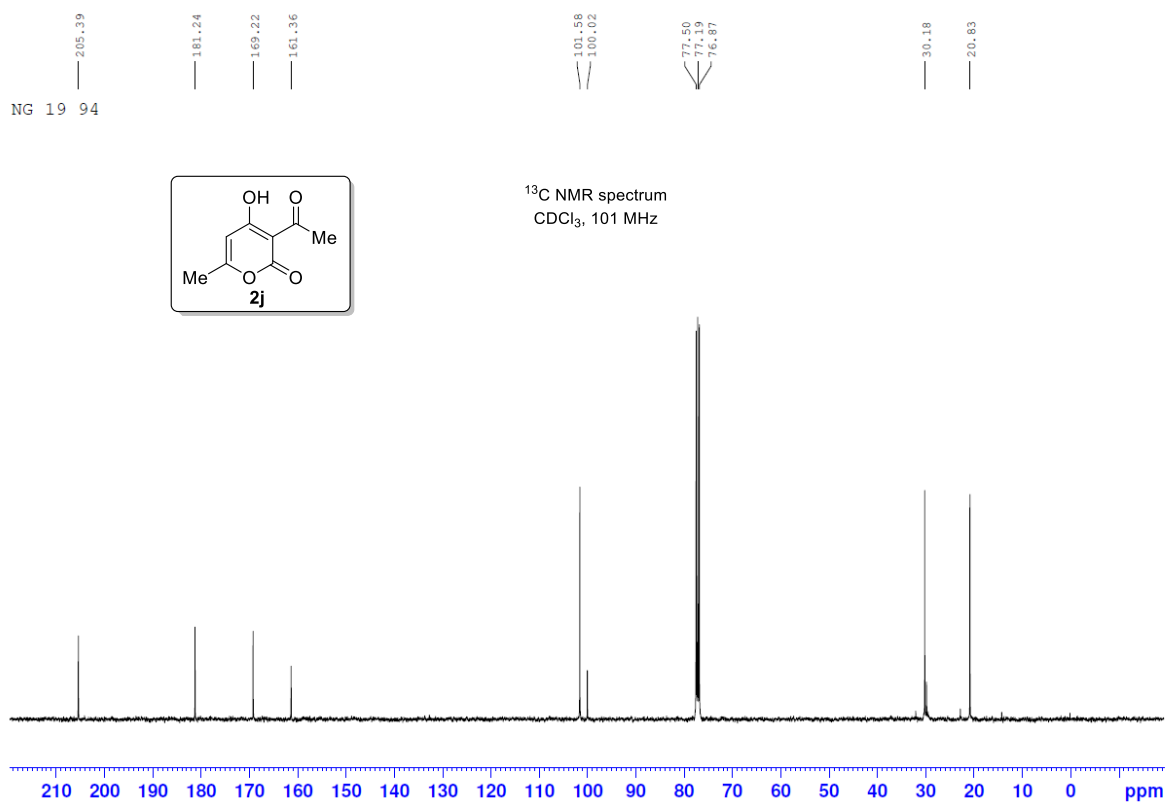



HRMS19104NOV15 #4 RT: 0.13 AV: 1 SB: 3 0.01-0.09 NL: 1.12E4  
T: FTMS + p ESI Full ms [100.00-1000.00]

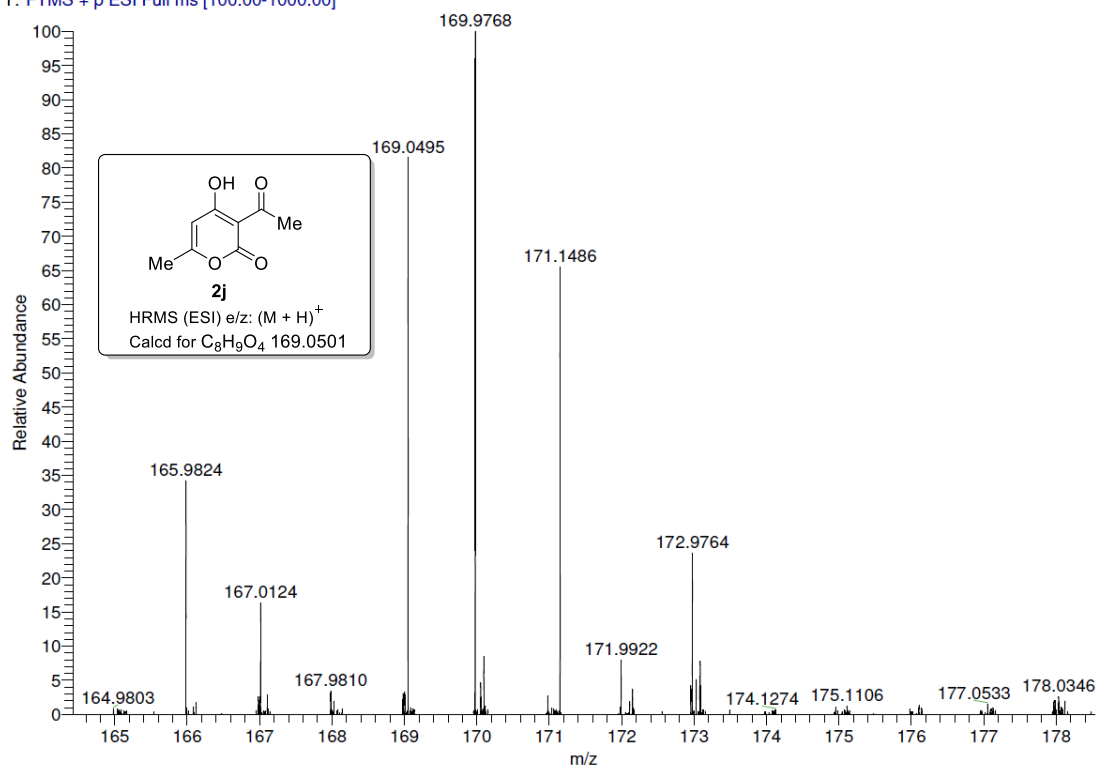

GR 20 65

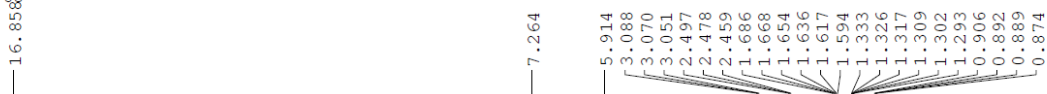

$^1H$  NMR spectrum  
 $CDCl_3$ , 400 MHz

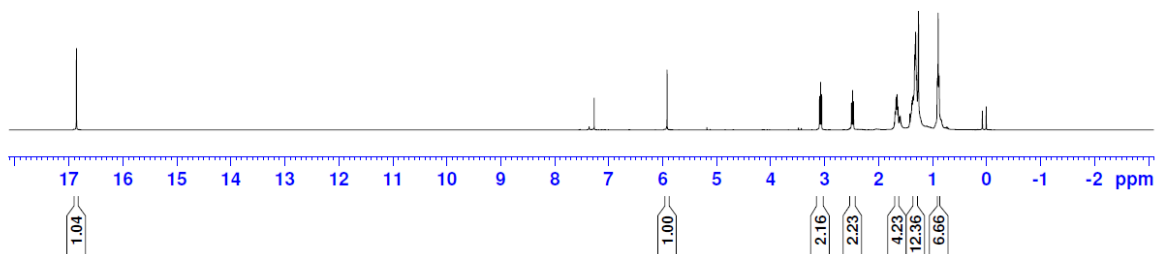

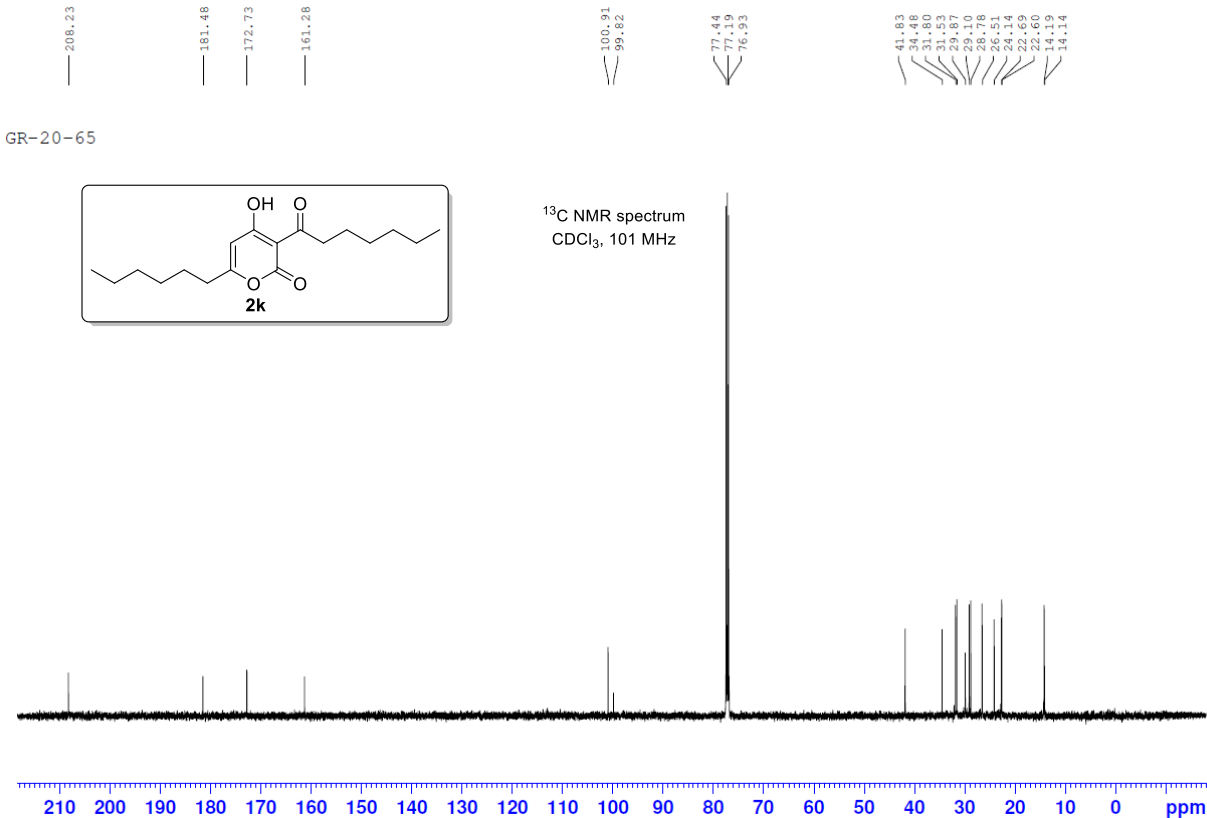

D:\INTERNALS\...May 2020\HRMS2011MAY08

5/11/2020 12:11:58 PM

GR-20-65

HRMS2011MAY08 #18-35 RT: 0.13-0.26 AV: 18 SB: 8 0.02-0.08 NL: 2.13E6  
 T: FTMS + p ESI Full ms [100.00-750.00]

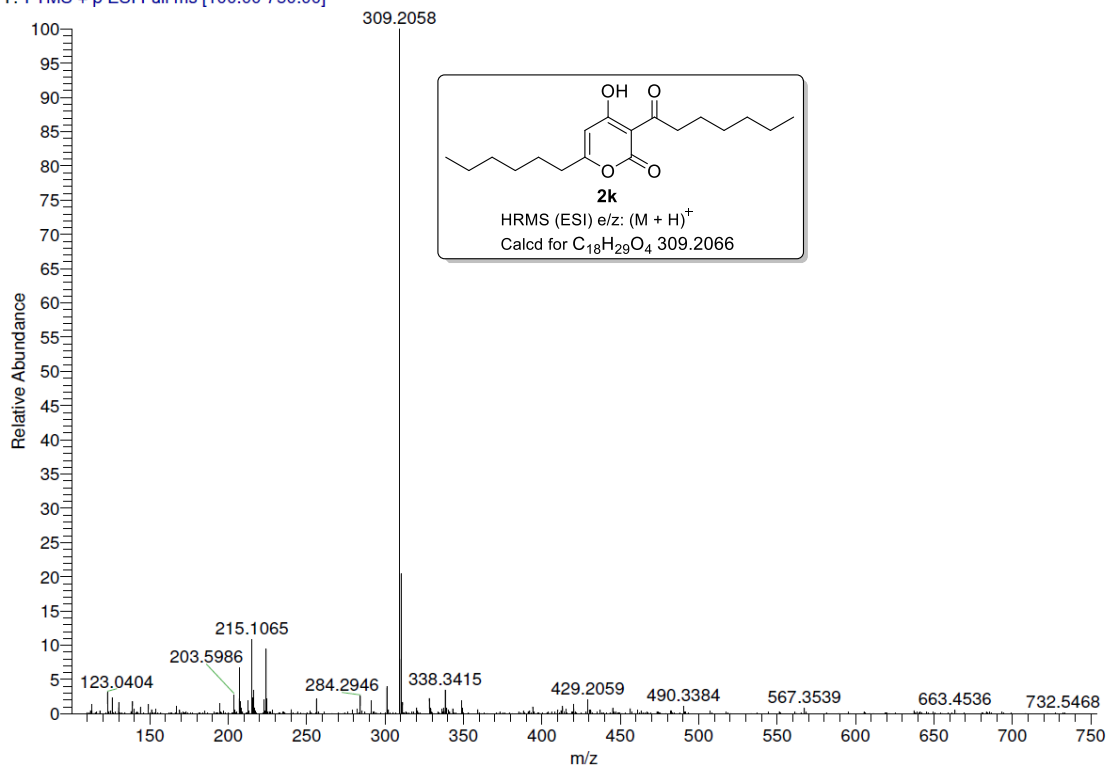

— 15.875

GR-20-54L

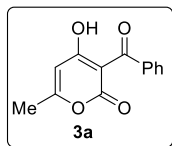

<sup>1</sup>H NMR spectrum  
CDCl<sub>3</sub>, 400 MHz

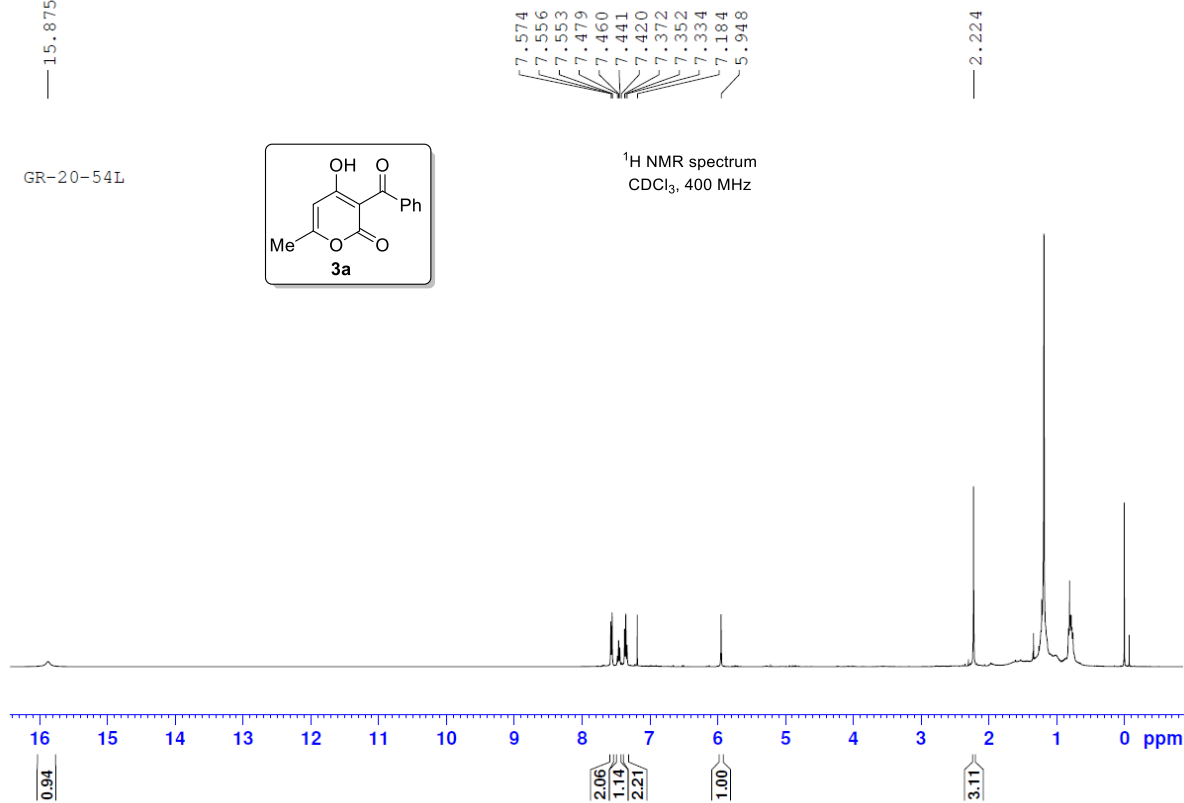

GR-20-54L

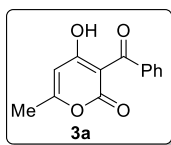

<sup>13</sup>C NMR spectrum  
CDCl<sub>3</sub>, 101 MHz

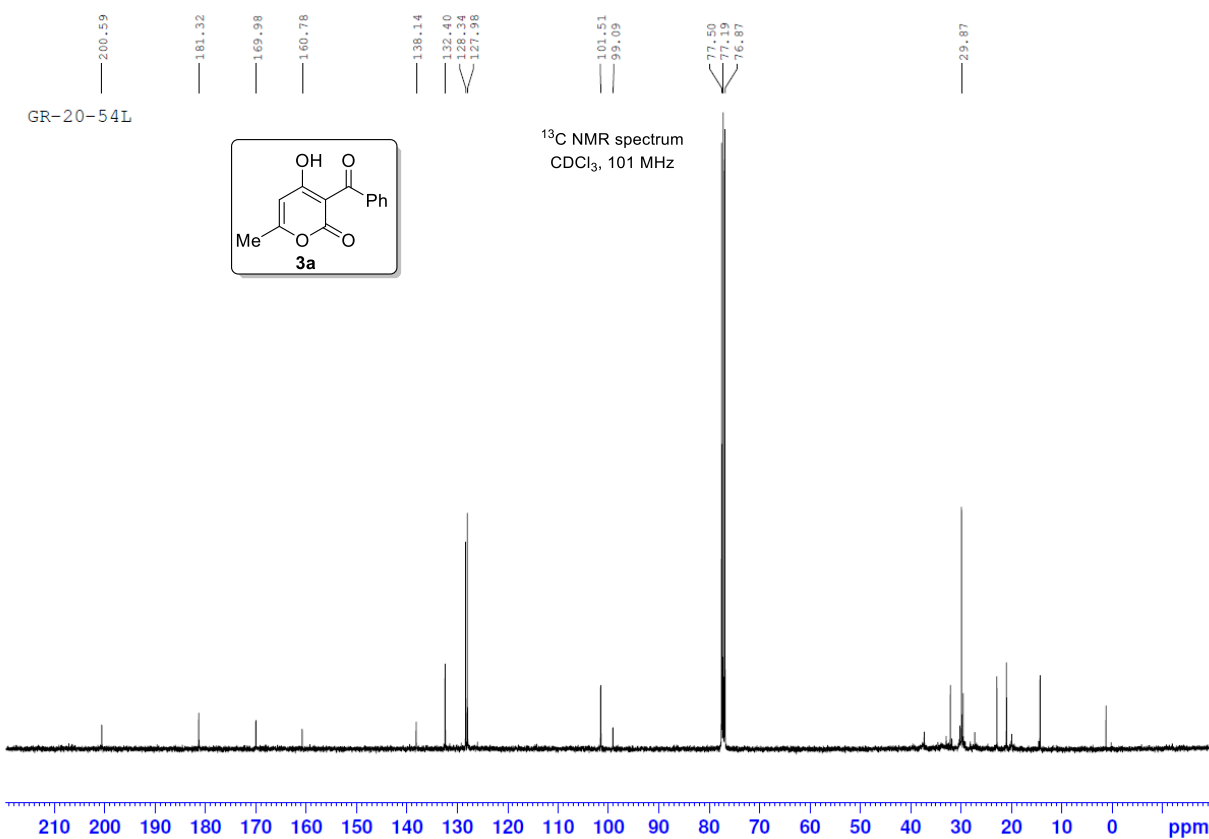

HRMS20102MAR14 #18-30 RT: 0.13-0.22 AV: 13 SB: 7 0.02-0.07 NL: 5.11E6  
T: FTMS + p ESI Full ms [100.00-1500.00]

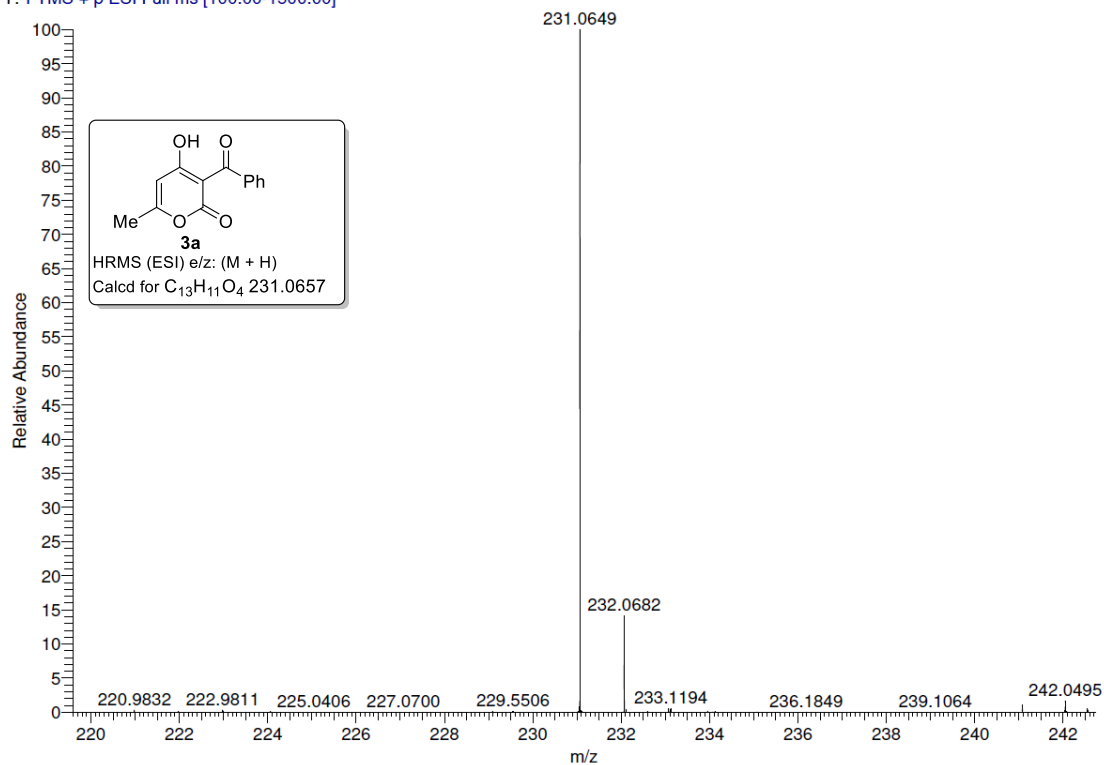

16.598

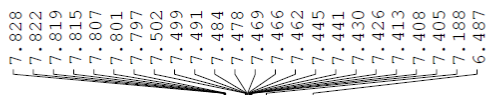

2.648

GR-20-54NI

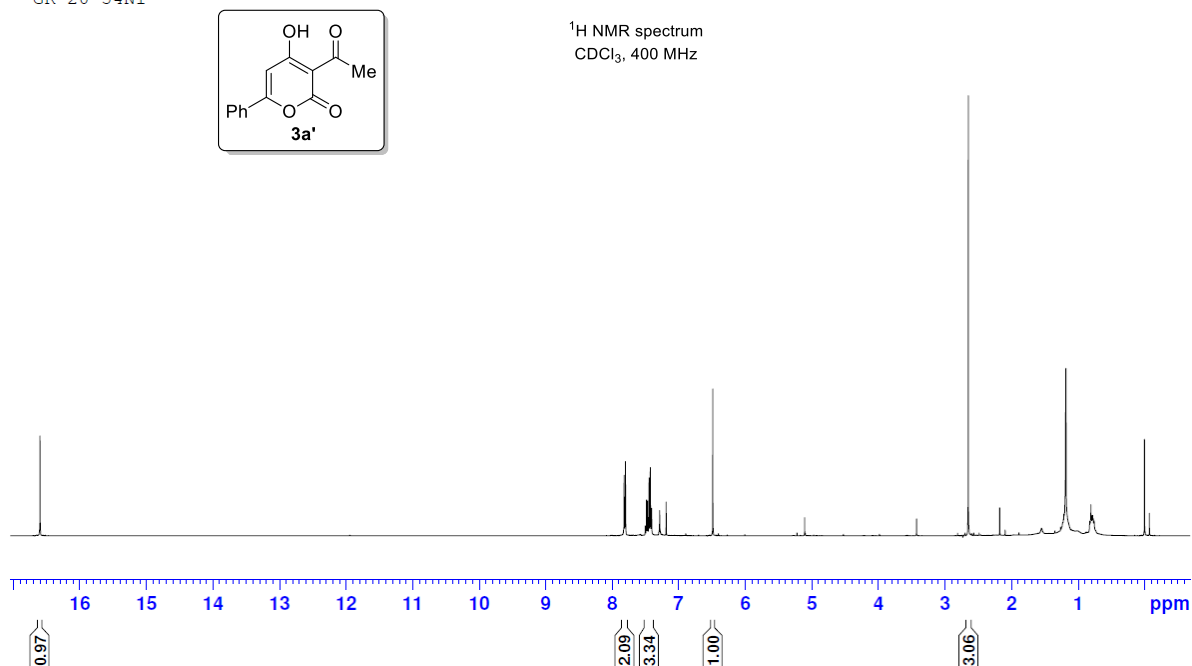

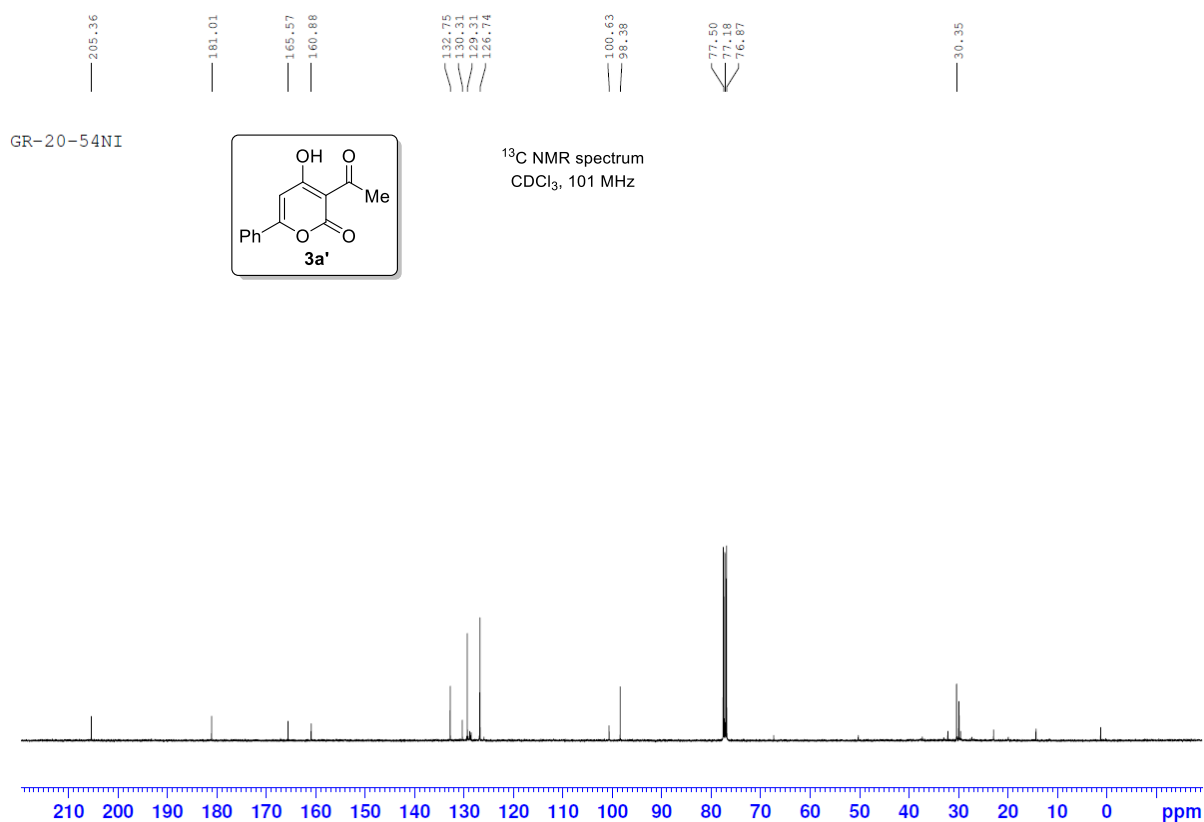

D:\INTERNALS\2020\Mar2020\HRMS20I02MAR15

3/2/2020 11:37:33 AM

GR-20-54NI

HRMS20I02MAR15 #19-30 RT: 0.14-0.23 AV: 12 SB: 7 0.02-0.07 NL: 7.52E5  
T: FTMS + p ESI Full ms [100.00-1500.00]

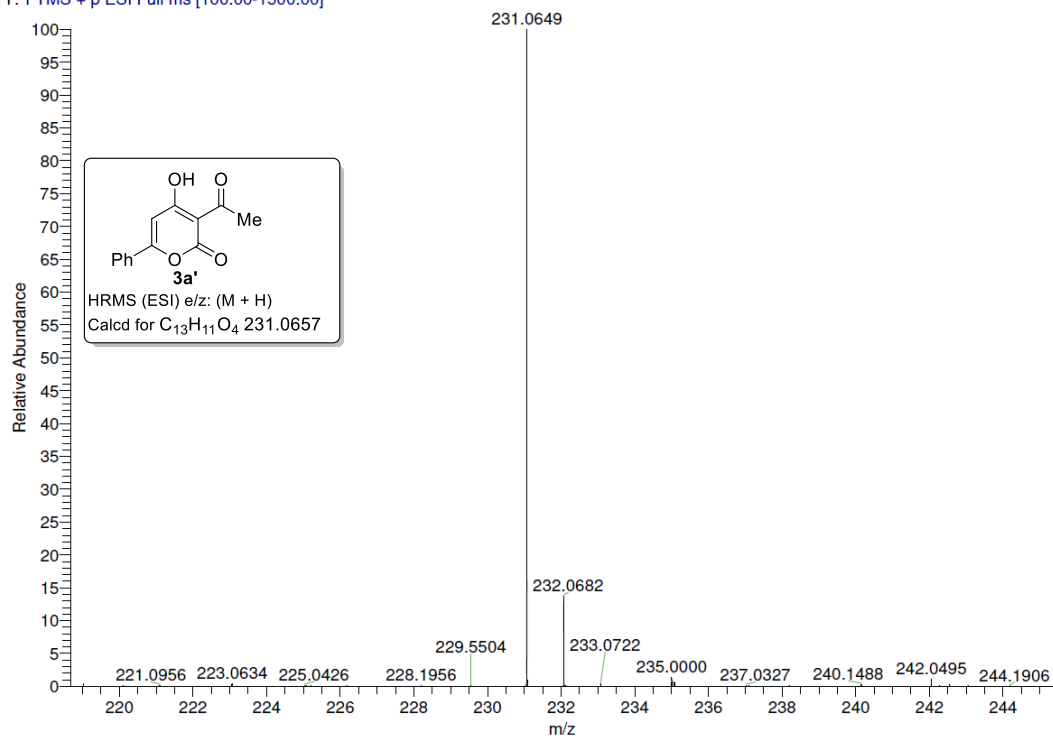

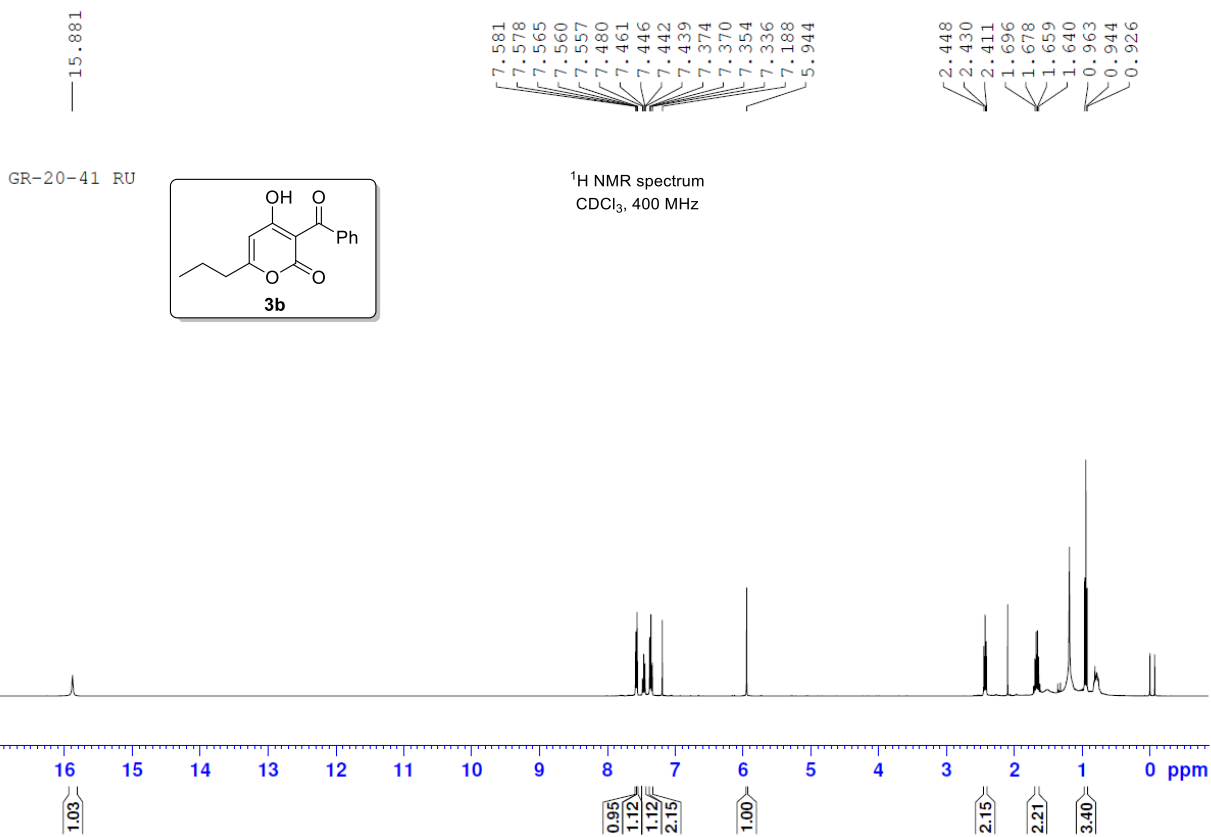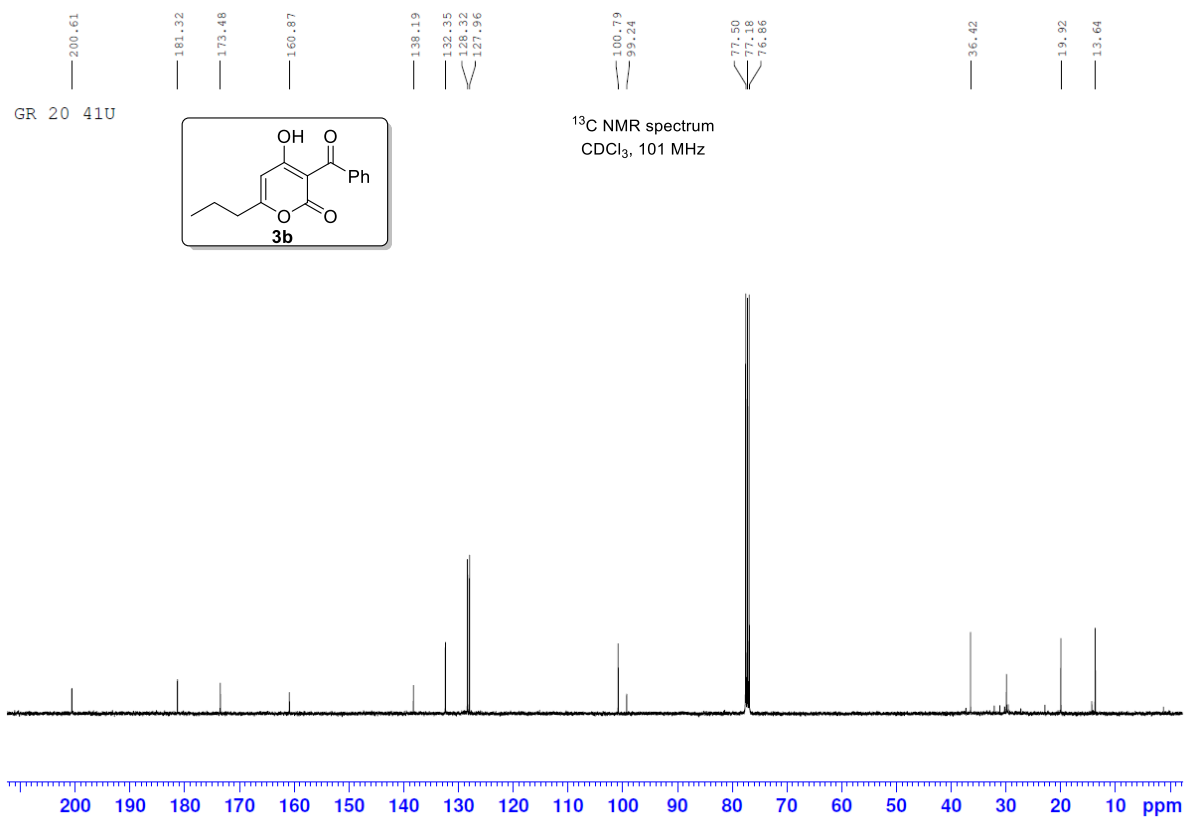

HRMS2011FEB16 #20-33 RT: 0.15-0.25 AV: 14 SB: 7 0.02-0.07 NL: 2.27E6  
T: FTMS + p ESI Full ms [100.00-1500.00]

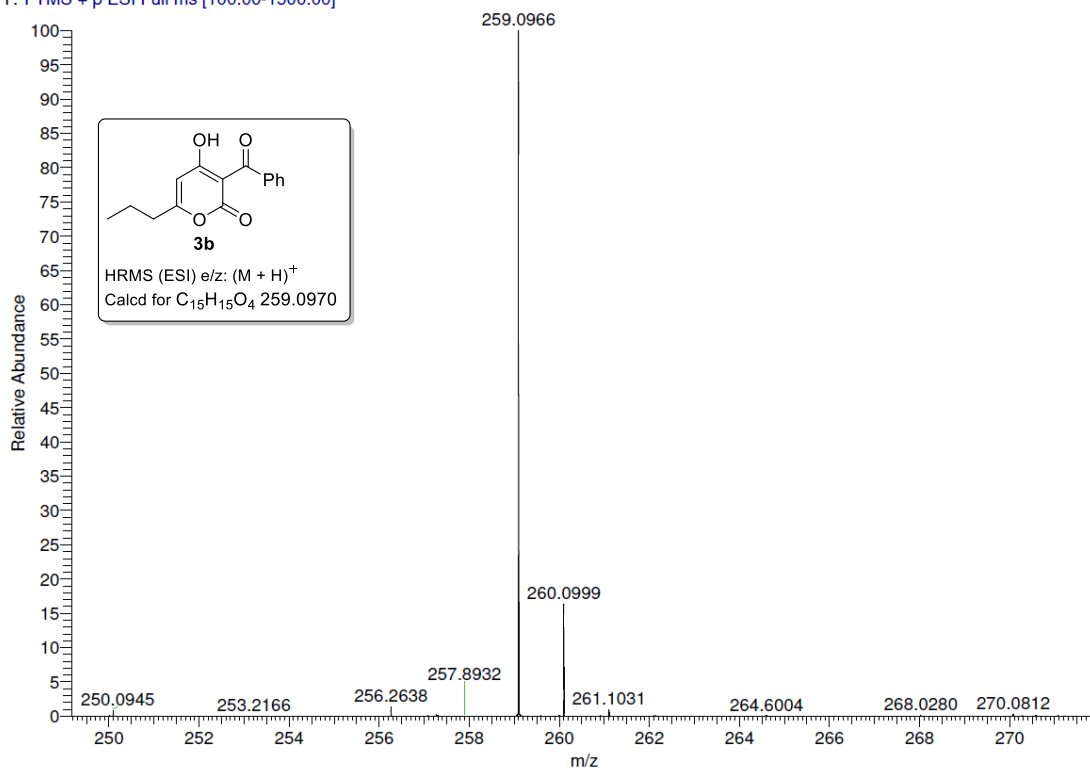

15.878

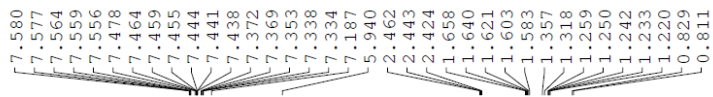

GR-20-66U

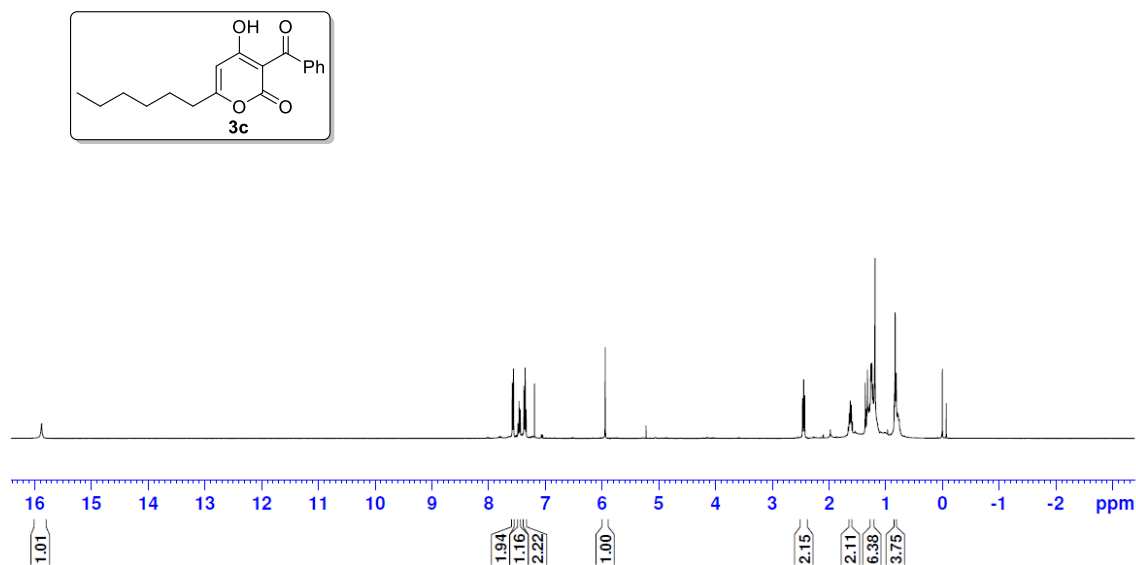

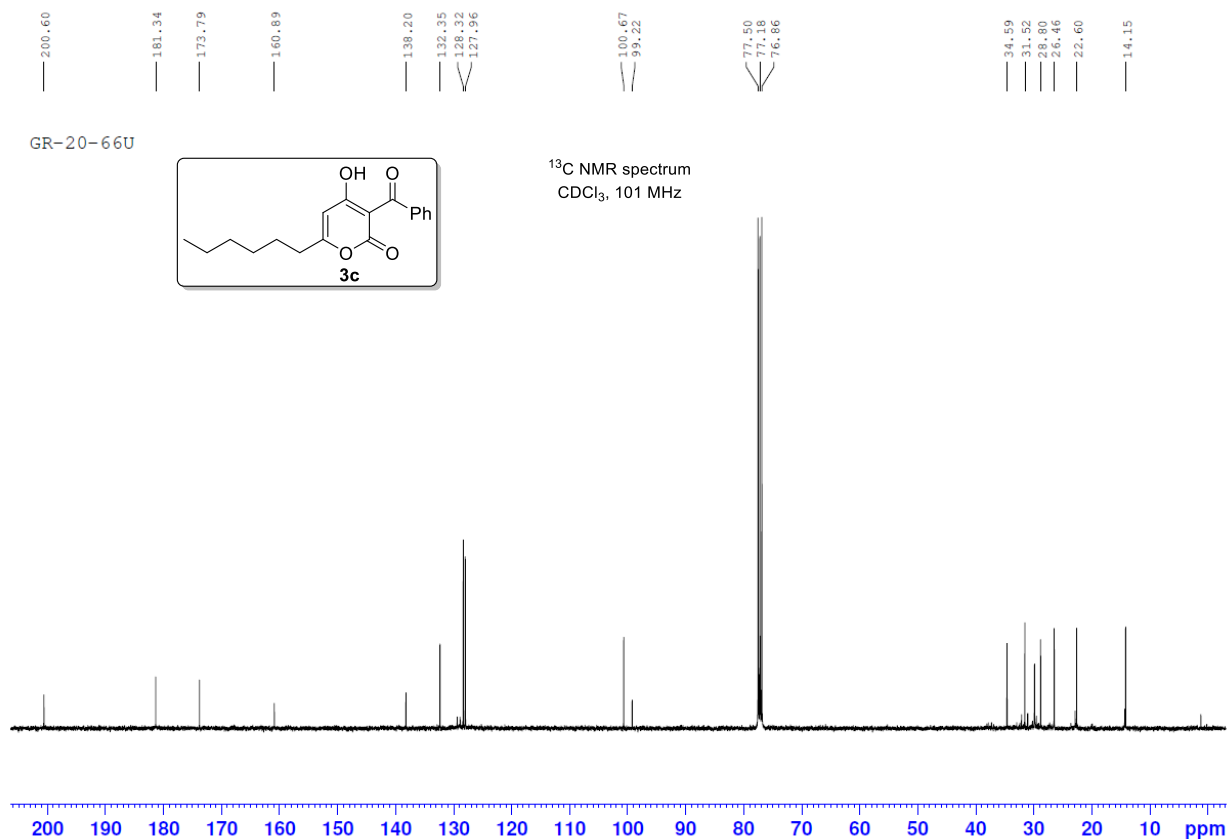

|                   |                      |                       |                           |
|-------------------|----------------------|-----------------------|---------------------------|
| Data File:        | HRMS20I17MAR01       | Original Data Path:   | D:\INTERNALS\2020\Mar2020 |
| Sample ID:        | GR-20-66U            | Sample Name:          |                           |
| Acquisition Date: | 03/17/20 11:26:01 AM | Run Time(min):        | 0.00                      |
| Vial:             | CStk1-01:01          | Injection Volume(μl): | 1.00                      |

HRMS20I17MAR01 #15-29 RT: 0.11-0.21 AV: 15 SB: 1 0.01 NL: 4.75E6  
T: FTMS + p ESI Full ms [100.00-750.00]

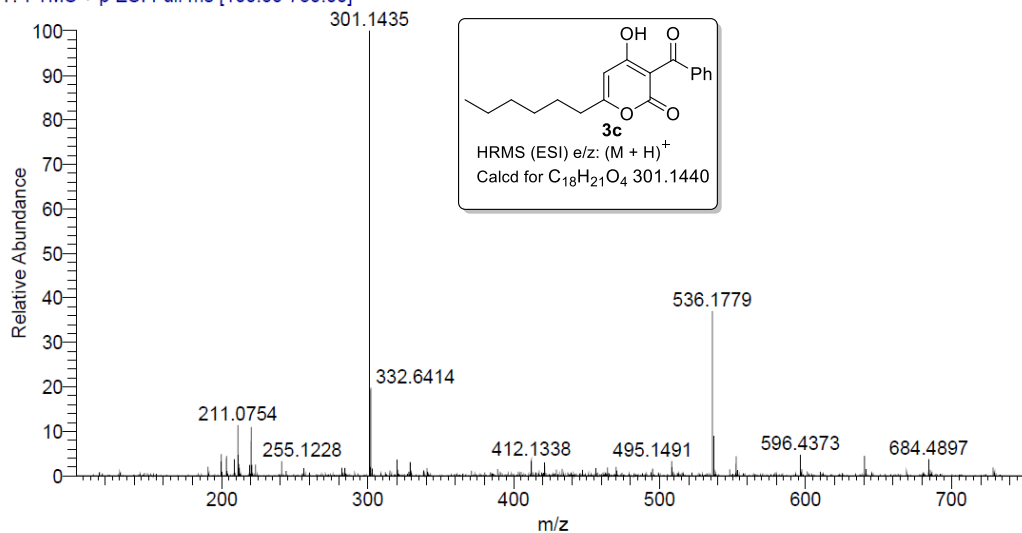



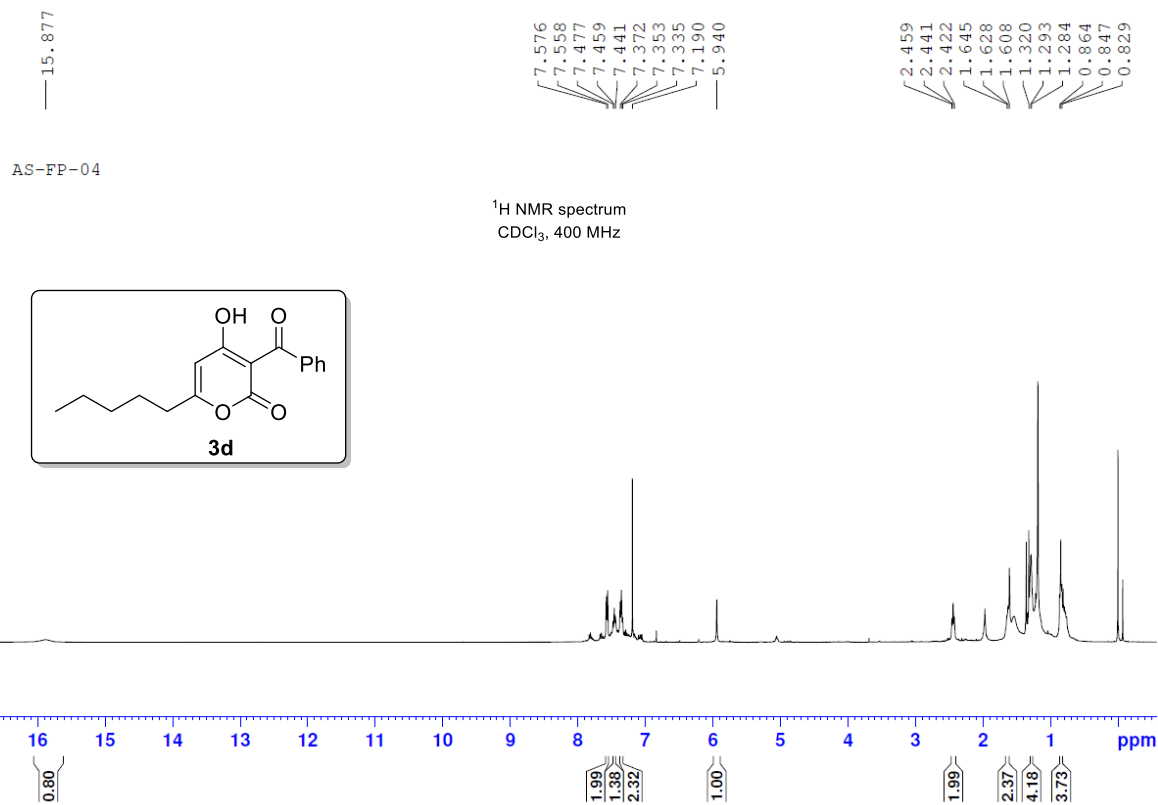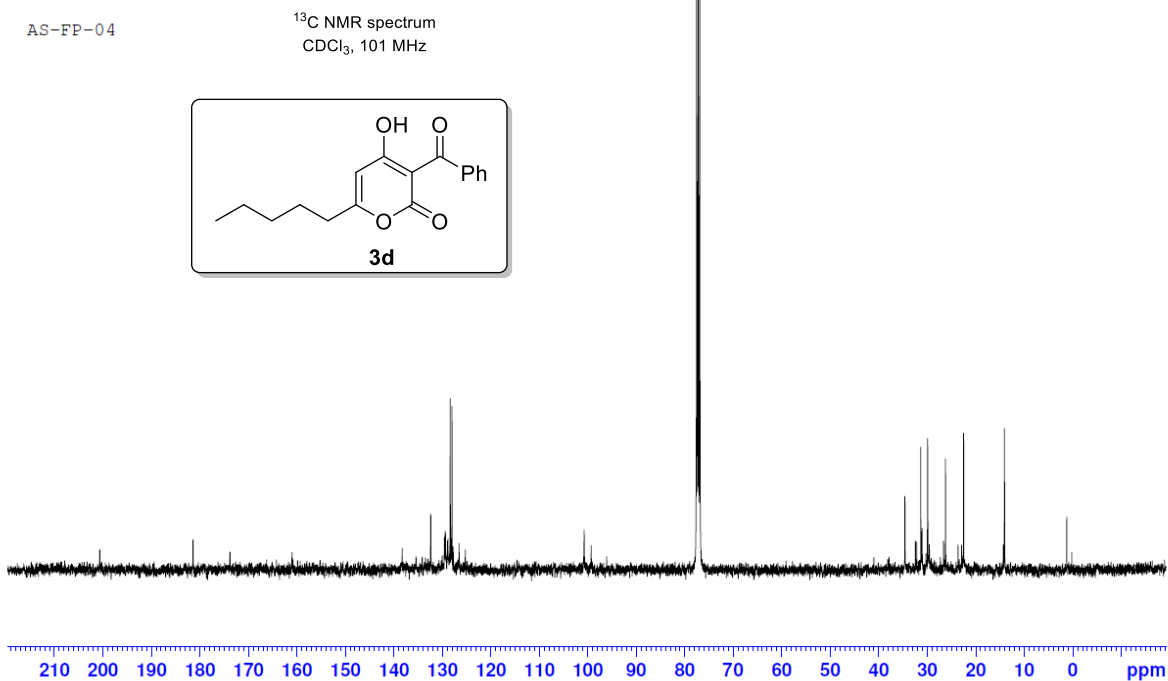

HRMS20\22SEP04 #19 RT: 0.16 AV: 1 SB: 7 0.02-0.08 NL: 4.26E5

T: FTMS + c ESI Full ms [100.00-750.00]

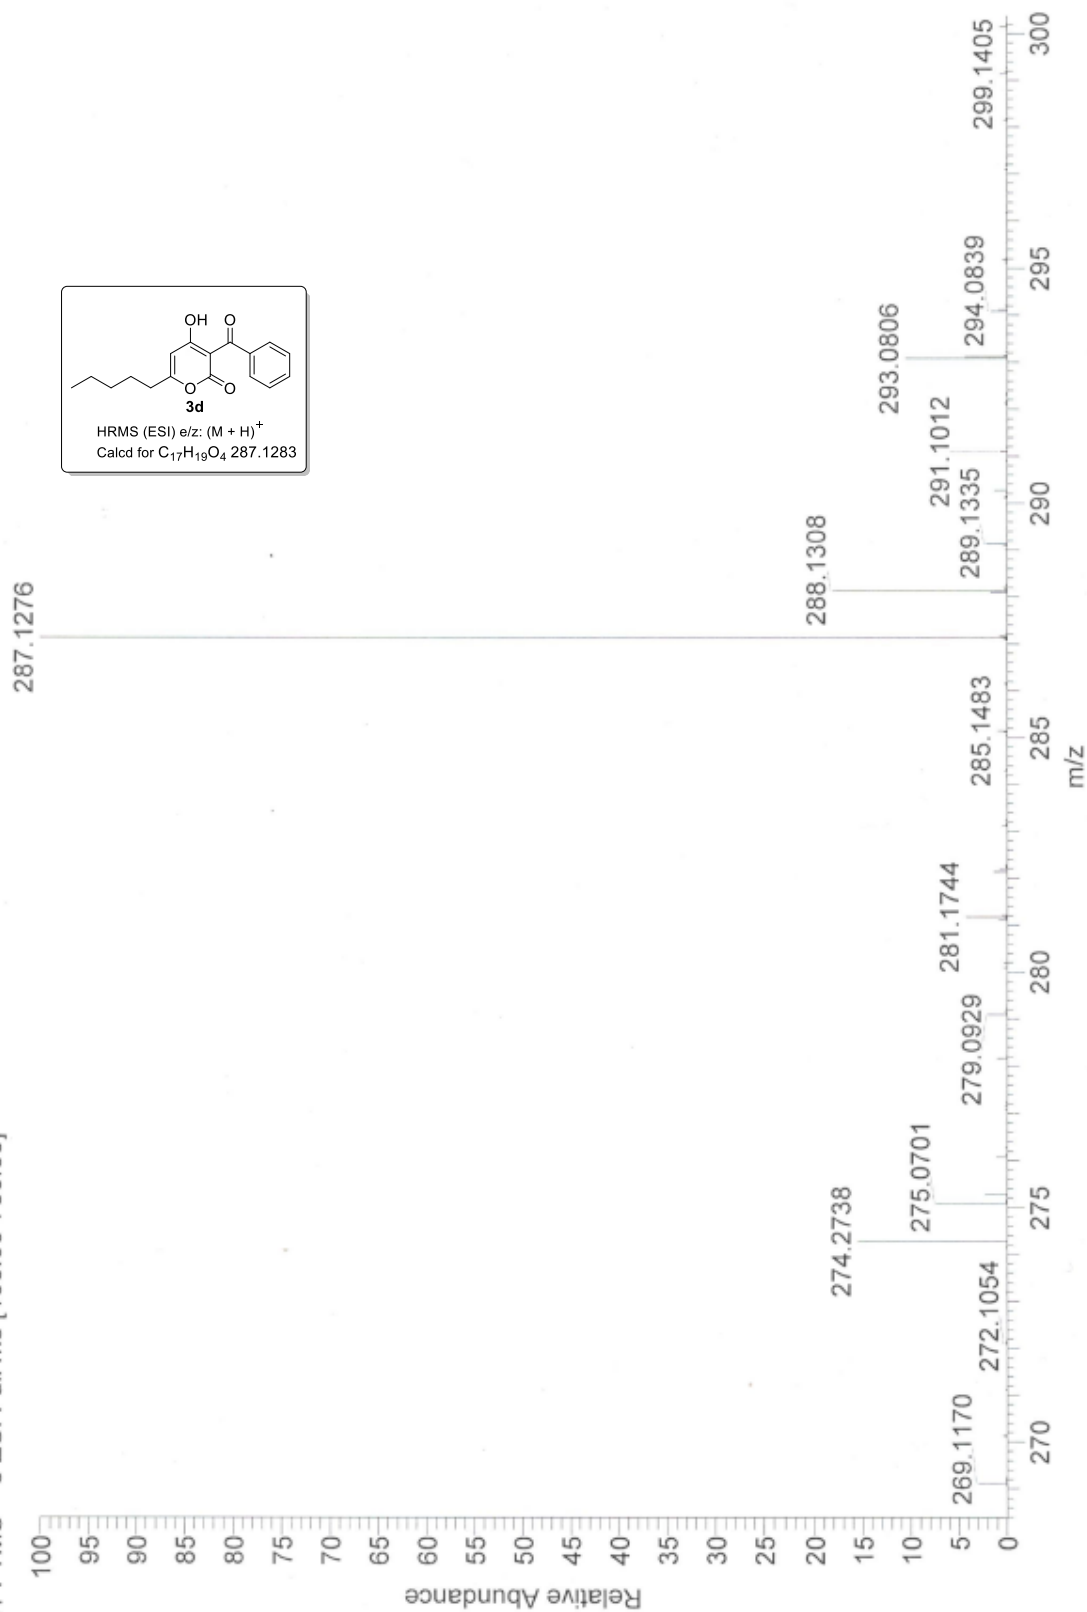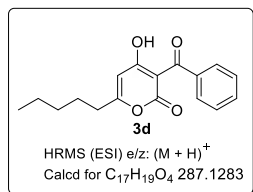

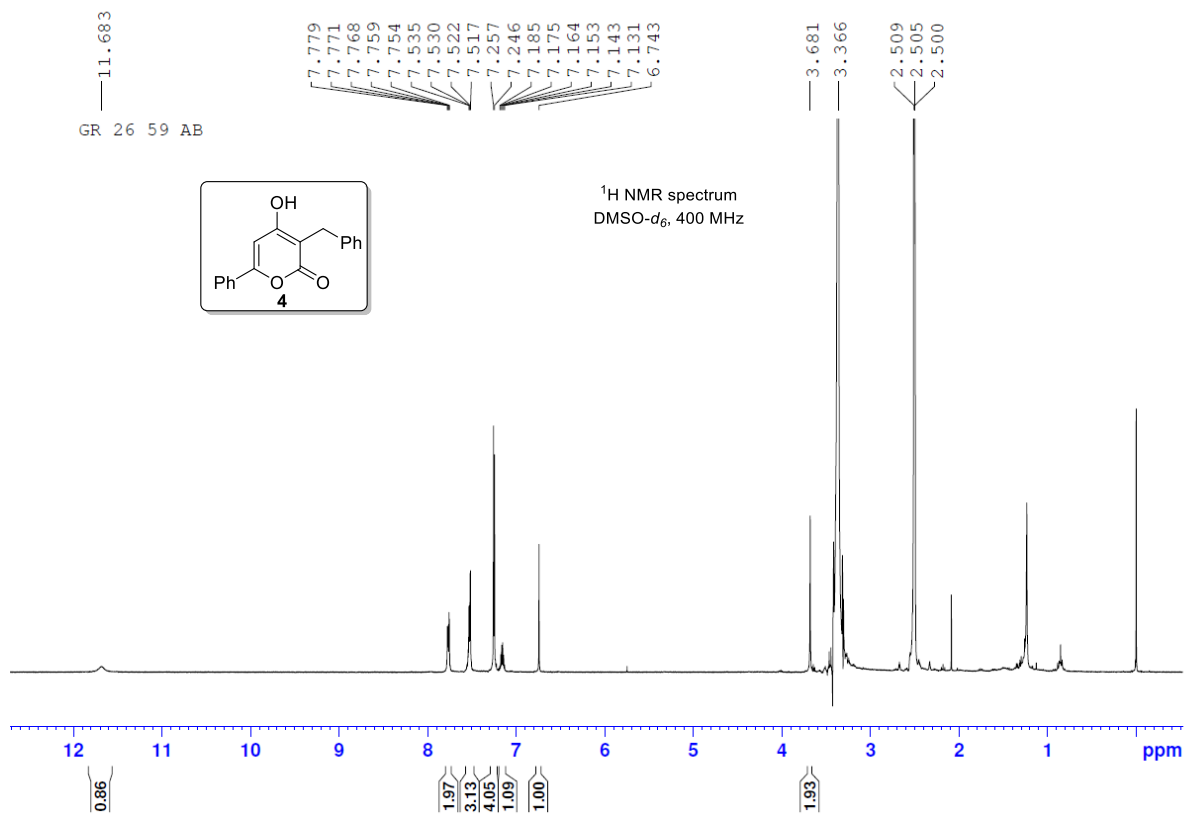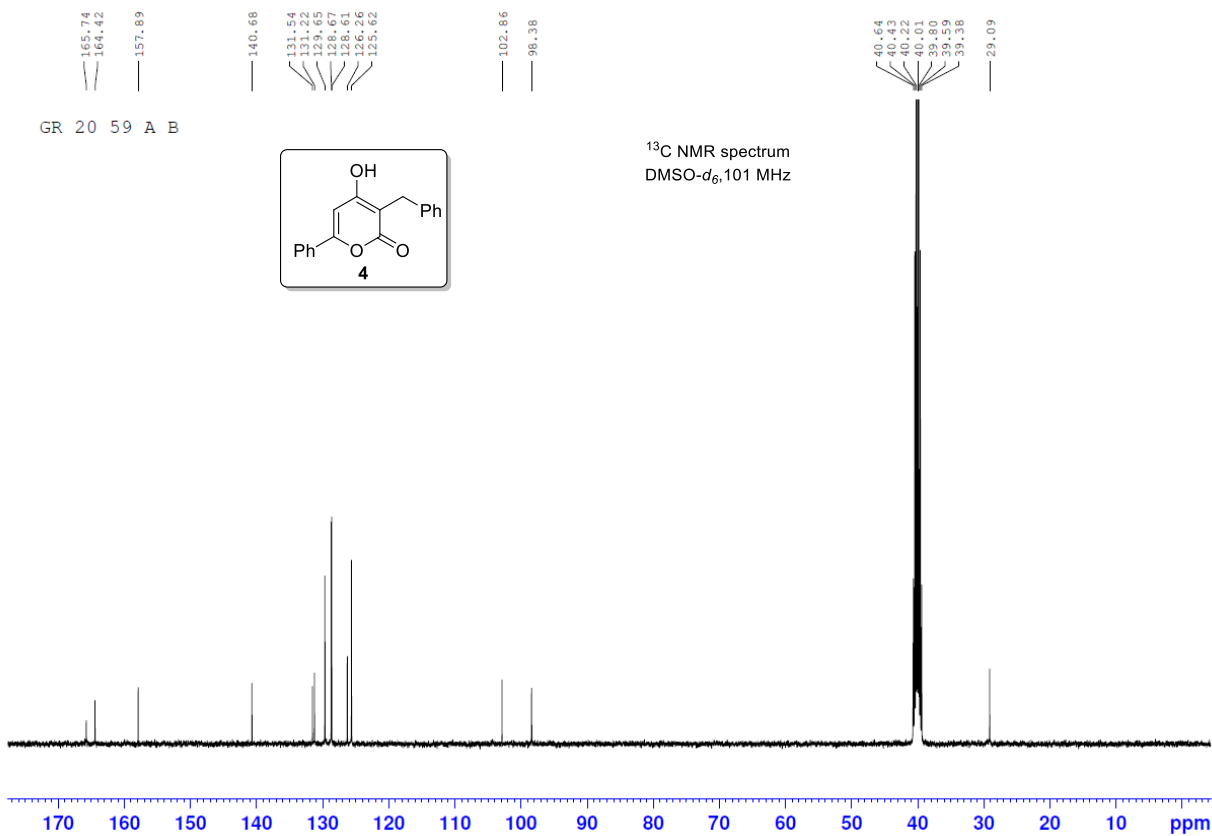

HRMS2013MAR13 #21-34 RT: 0.16-0.26 AV: 14 NL: 2.16E6  
T: FTMS + p ESI Full ms [100.00-1500.00]

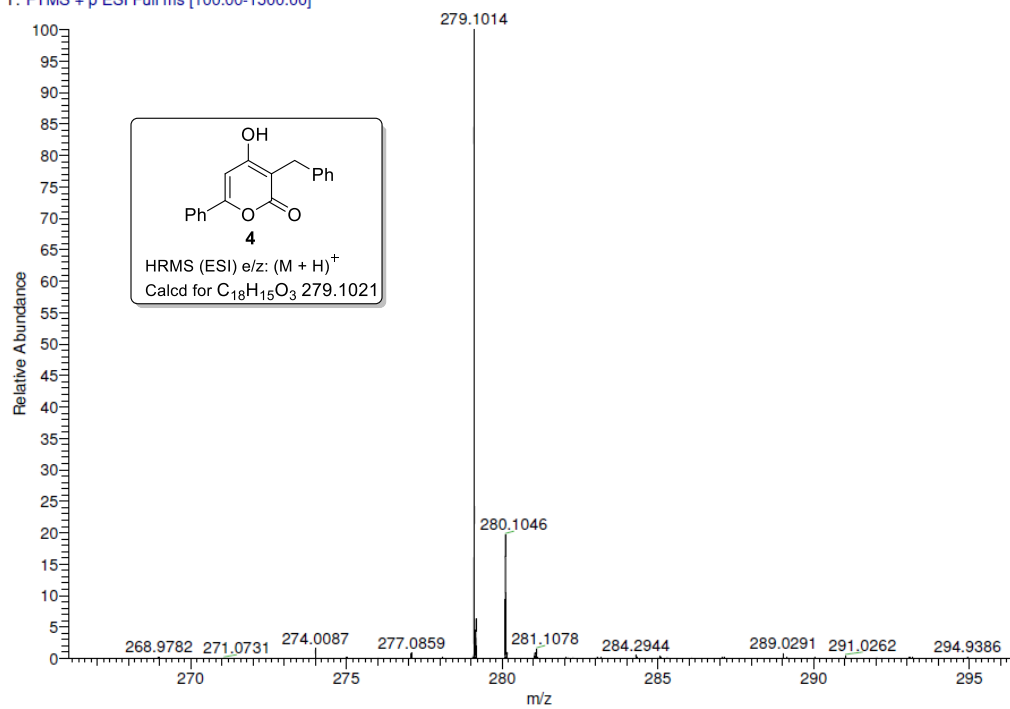

GR 20 61 U  
16.784

<sup>1</sup>H NMR spectrum  
CDCl<sub>3</sub>, 400 MHz

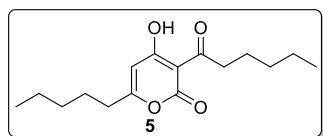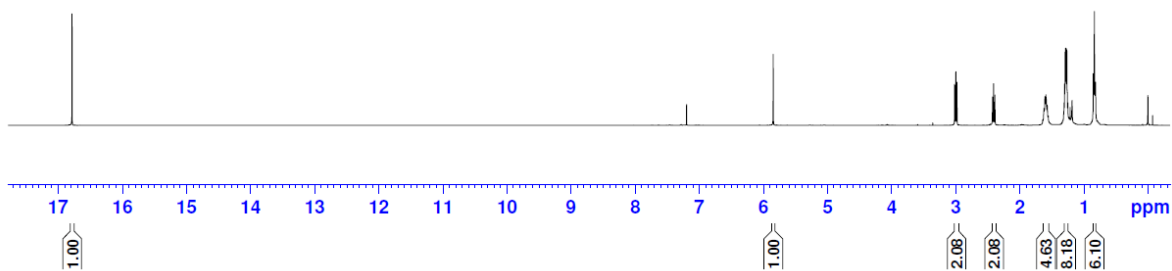

208.20  
181.44  
172.70  
161.26

100.89  
99.79  
77.50  
77.18  
76.86

41.77  
34.42  
31.56  
31.22  
26.21  
25.83  
22.64  
22.42  
14.08  
14.00

GR 20 61 R

<sup>13</sup>C NMR spectrum  
CDCl<sub>3</sub>, 101 MHz

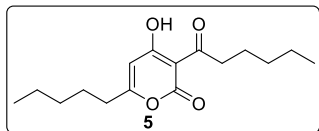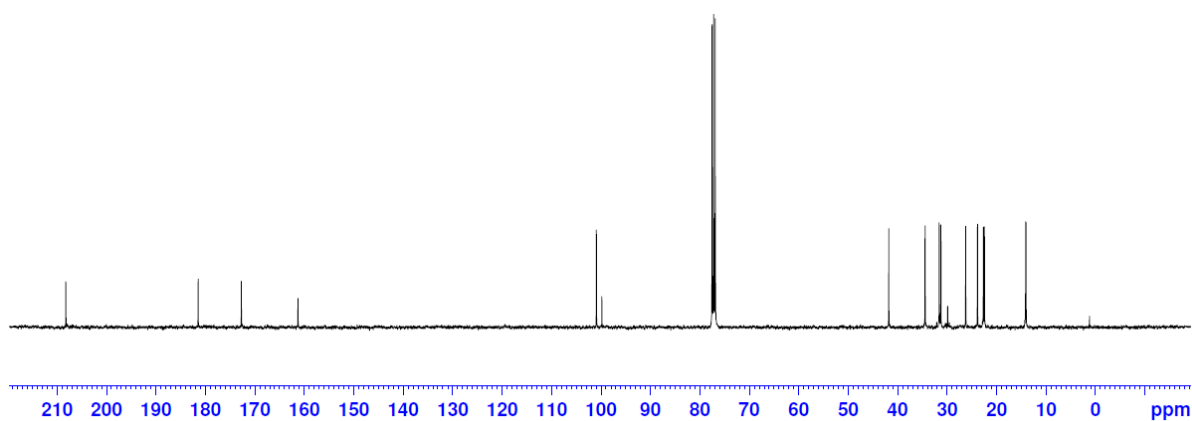

D:\INTERNALS\2020\Mar2020\HRMS20113MAR01

3/13/2020 11:19:08 AM

GR-20-61

HRMS20113MAR01 #25 RT: 0.18 AV: 1 NL: 4.10E6  
T: FTMS + p ESI Full ms [100.00-1500.00]

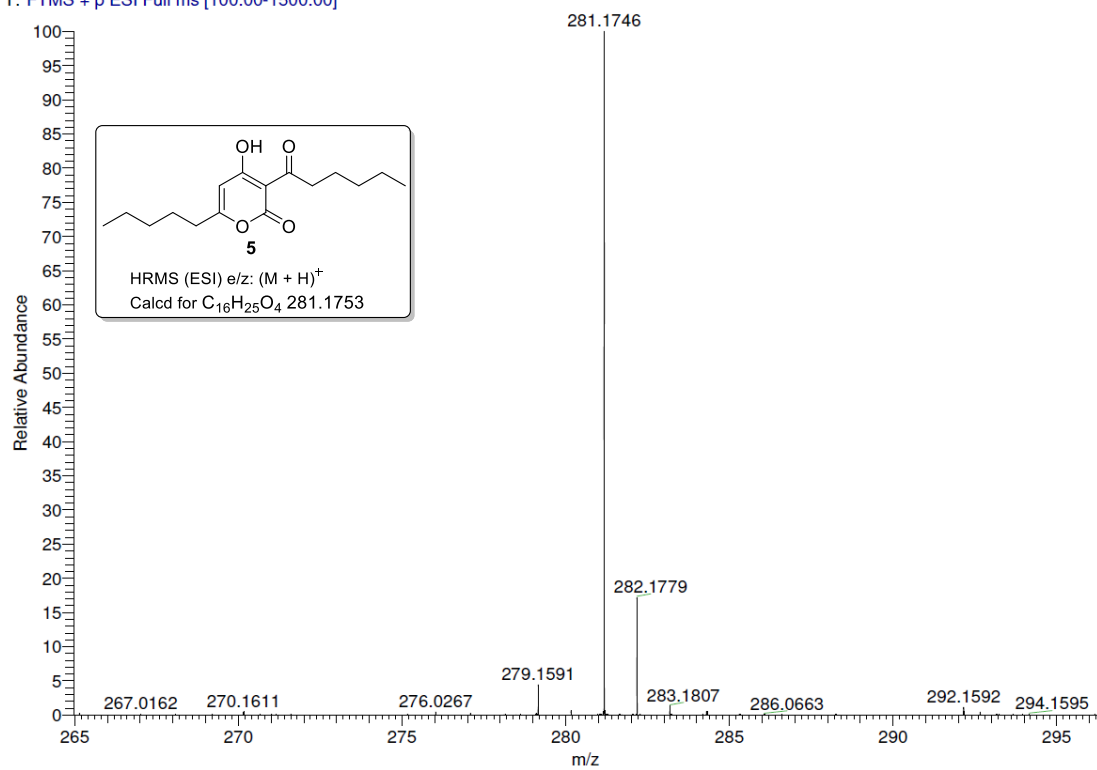

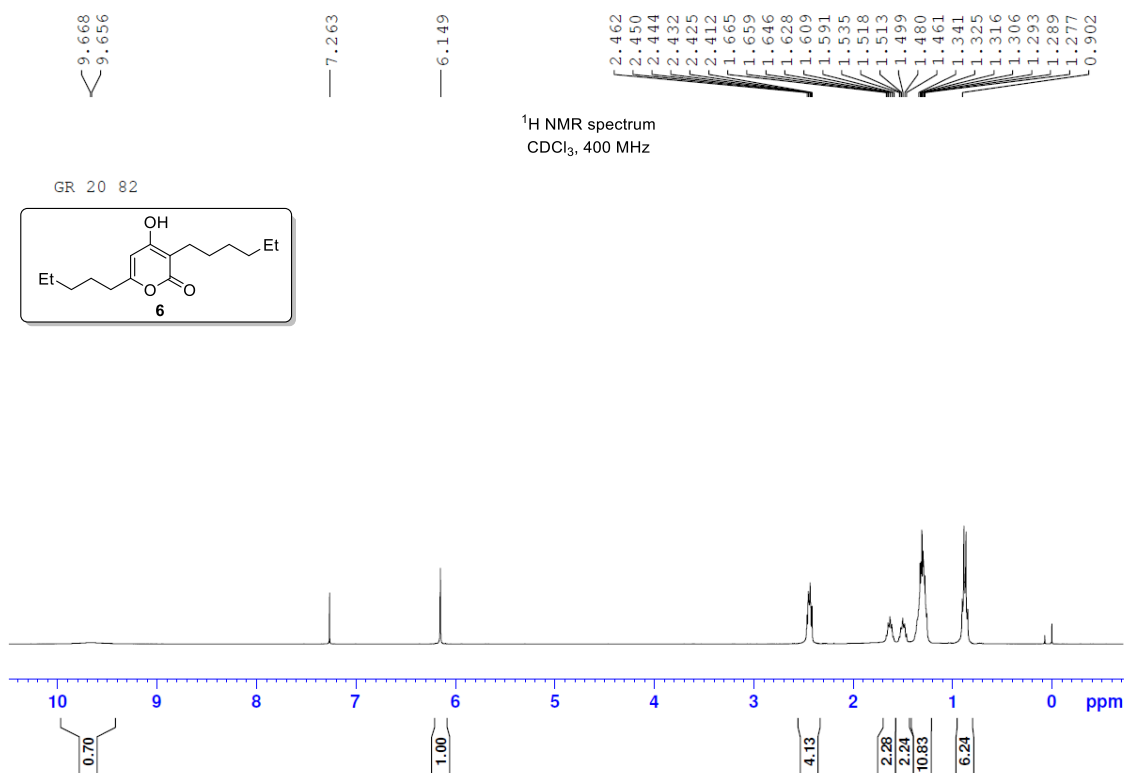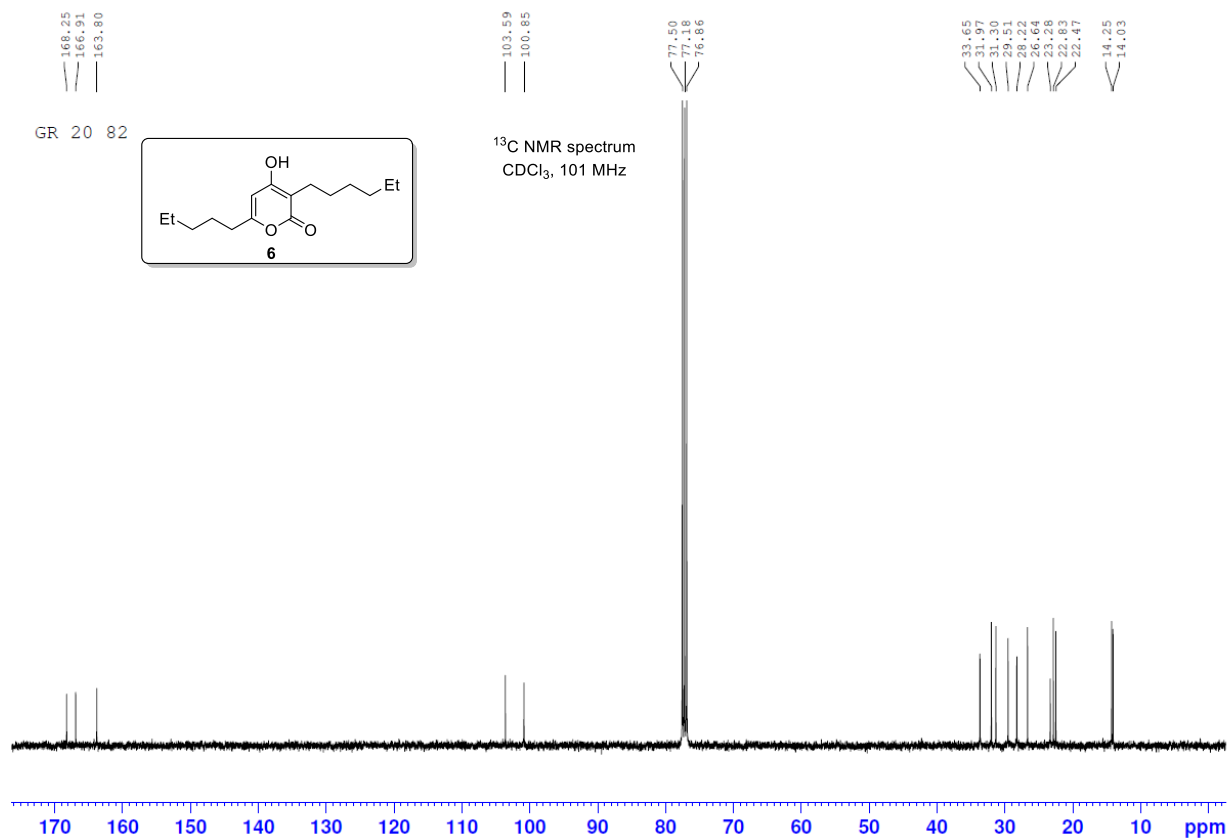

# SAIF [HRMS Report]

|                   |                      |                       |                               |
|-------------------|----------------------|-----------------------|-------------------------------|
| Data File:        | HRMS20I20MAY24       | Original Data Path:   | D:\INTERNAL NEW\2020\MAY 2020 |
| Sample ID:        | GR-20-82             | Sample Name:          |                               |
| Acquisition Date: | 05/20/20 11:49:13 AM | Run Time(min):        | 0.00                          |
| Vial:             | CStk1-01:24          | Injection Volume(μl): | 1.00                          |

HRMS20I20MAY24 #11-25 RT: 0.11-0.21 AV: 15 SB: 1 0.01 NL: 9.63E6  
T: FTMS + p ESI Full ms [100.00-500.00]

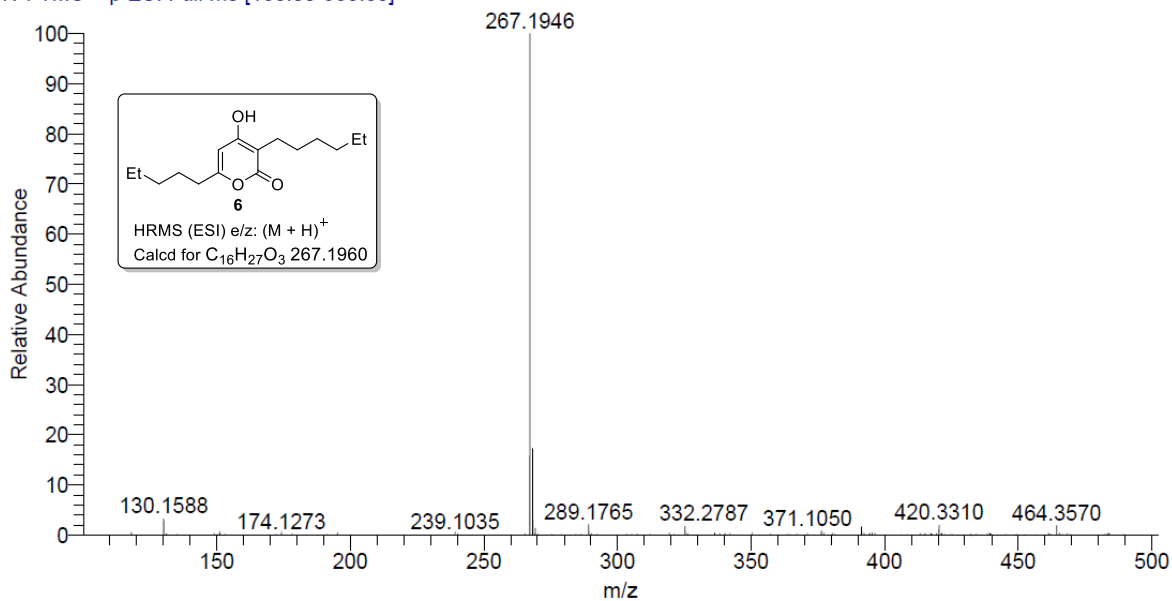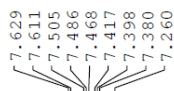

NG-20-111B

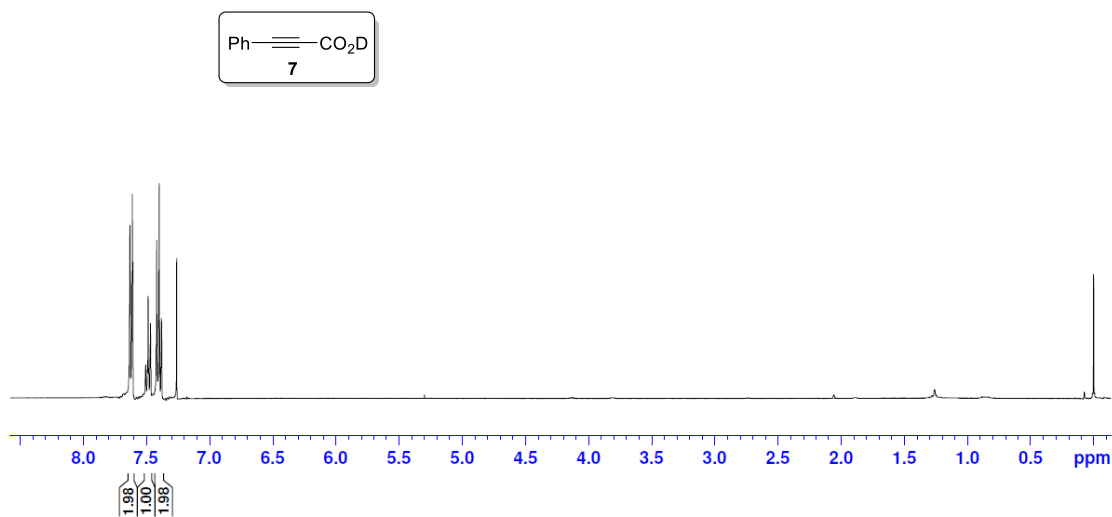

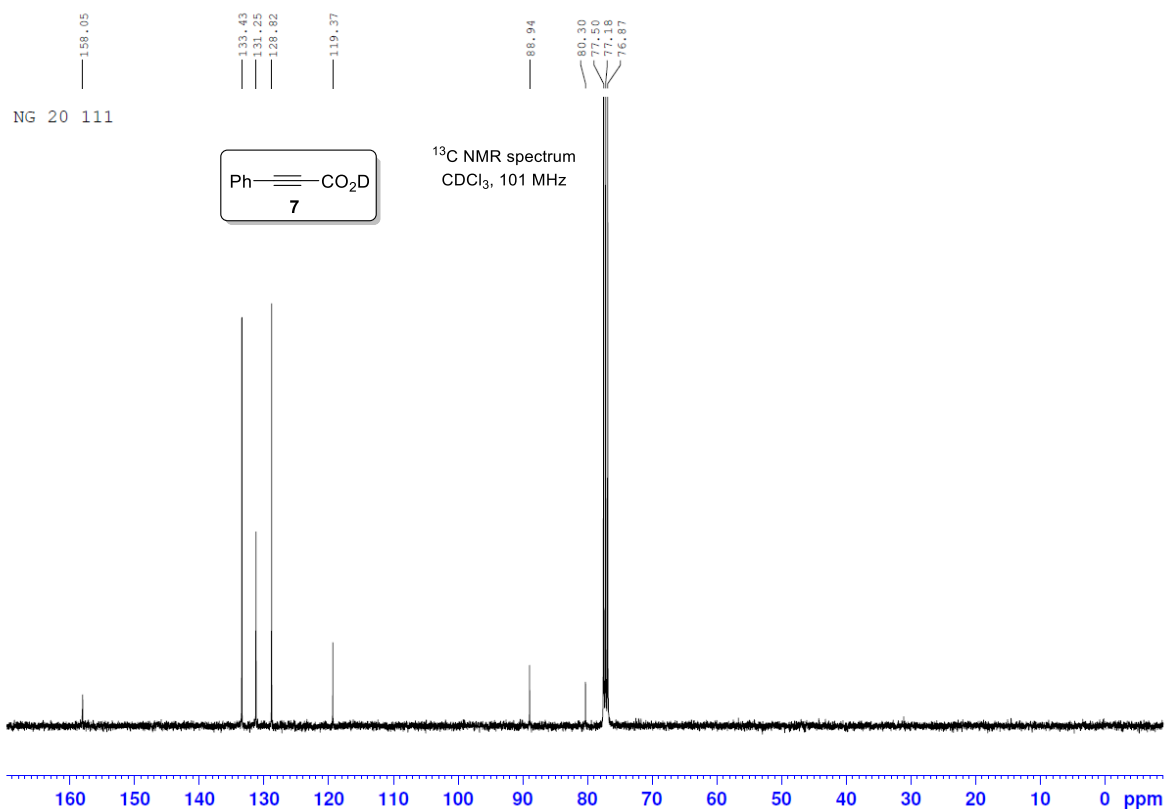

NG-20-112

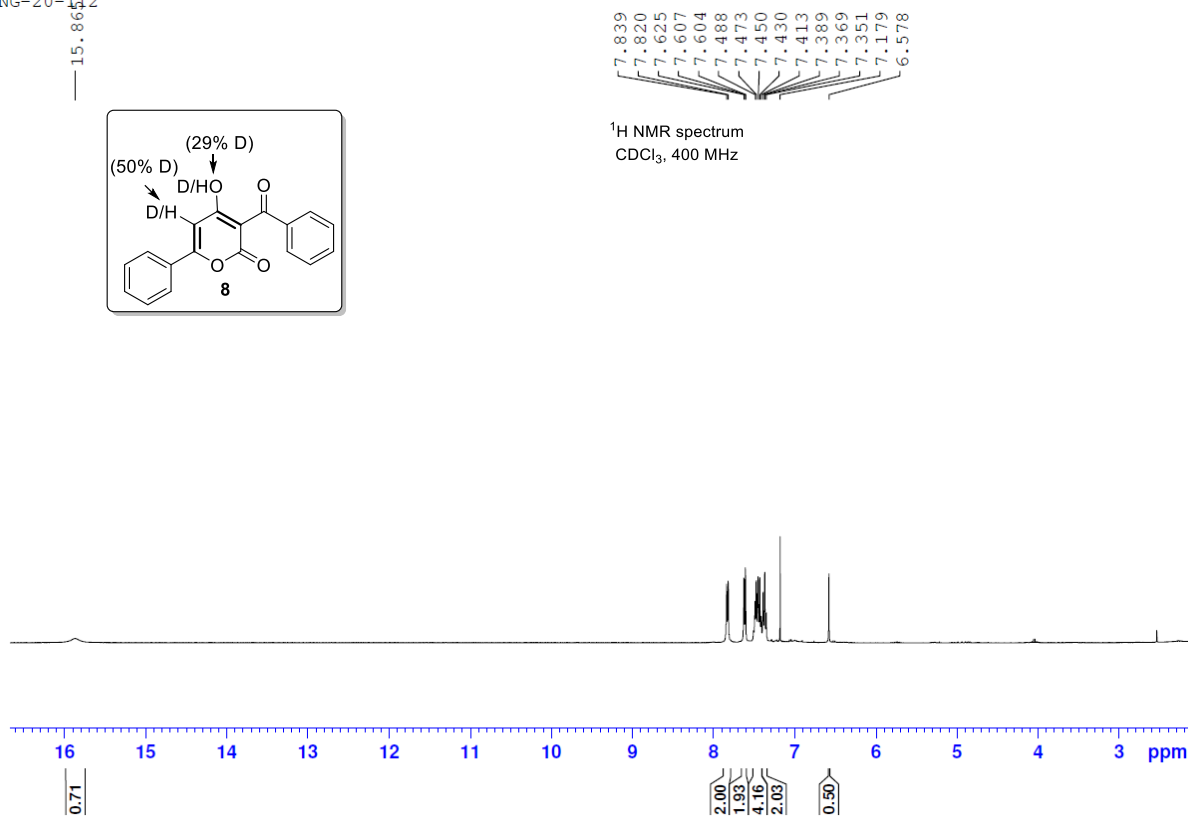



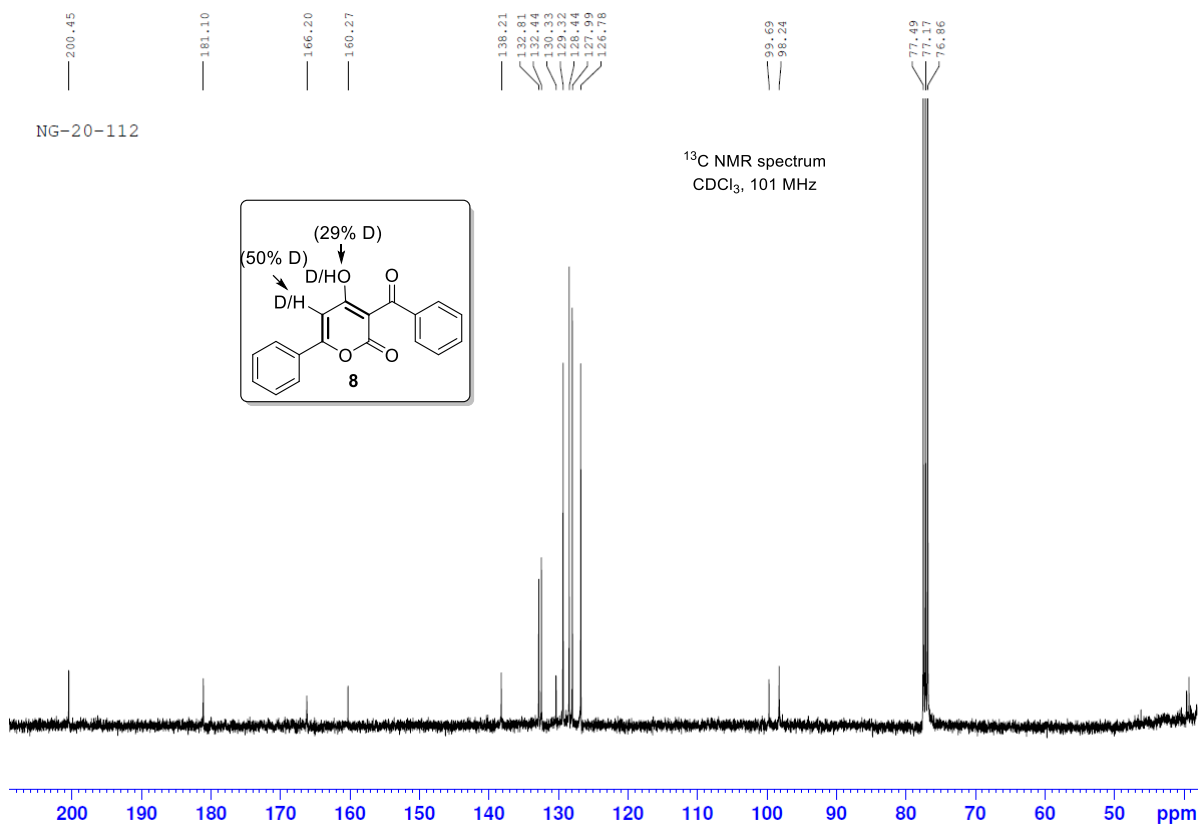

D:\INTERNALS\2020\FEB2020\HRMS20I05FEB19

2/5/2020 11:57:53 AM

NG-20-112

HRMS20I05FEB19 #18-35 RT: 0.14-0.27 AV: 18 SB: 7 0.02-0.07 NL: 6.24E4  
T: FTMS + p ESI Full ms [100.00-1500.00]

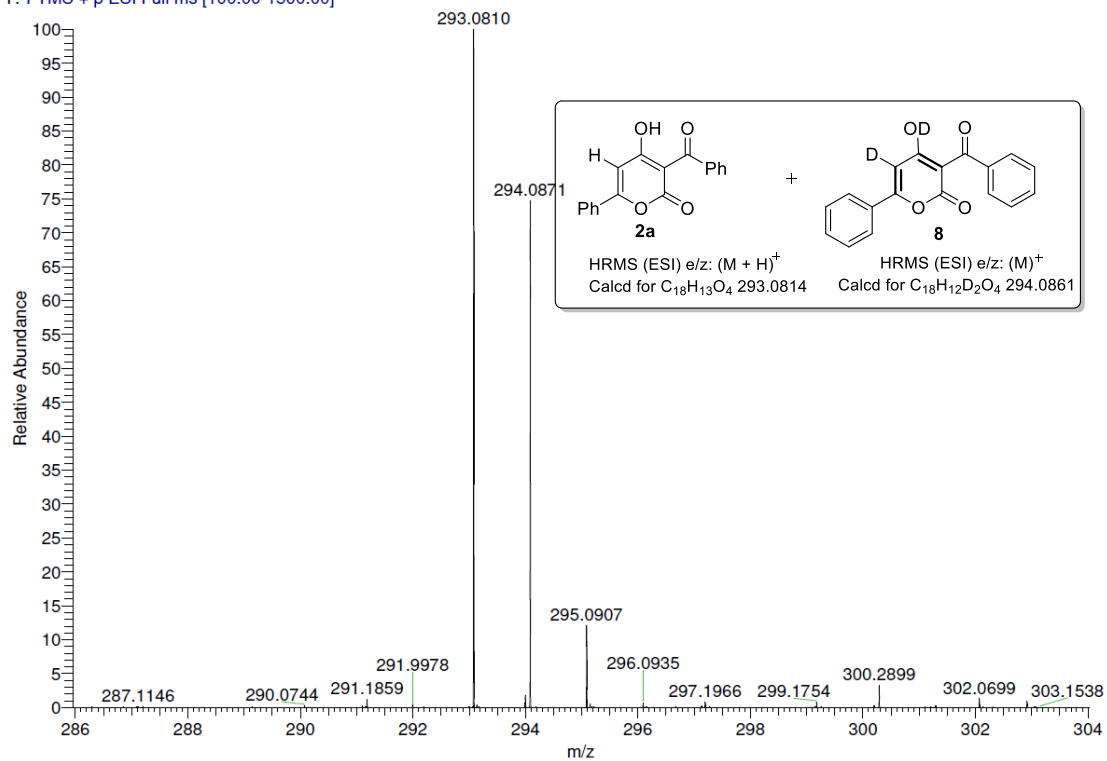

Supplement: d0ob01700k1.pdf [file d0ob01700k1.pdf]
